# K-nearest neighbor smoothing for high-throughput single-cell RNA-Seq data

Florian Wagner<sup>1+</sup>, Yun Yan<sup>1</sup>, and Itai Yanai<sup>1\*</sup>

<sup>1</sup>Institute for Computational Medicine, NYU School of Medicine, New York, NY, USA

<sup>+</sup>Email: [florian.wagner@nyu.edu](mailto:florian.wagner@nyu.edu)

<sup>\*</sup>Email: [itai.yanai@nyumc.org](mailto:itai.yanai@nyumc.org)

## ABSTRACT

High-throughput single-cell RNA-Seq (scRNA-Seq) methods can efficiently generate expression profiles for thousands of cells, and promise to enable the comprehensive molecular characterization of all cell types and states present in heterogeneous tissues. However, compared to bulk RNA-Seq, single-cell expression profiles are extremely noisy and only capture a fraction of transcripts present in the cell. Here, we propose an algorithm to smooth scRNA-Seq data, with the goal of significantly improving the signal-to-noise ratio of each profile, while largely preserving biological expression heterogeneity. The algorithm is based on the observation that across protocols, the technical noise exhibited by UMI-filtered scRNA-Seq data closely follows Poisson statistics. Smoothing is performed by first identifying the nearest neighbors of each cell in a step-wise fashion, based on variance-stabilized and partially smoothed expression profiles, and then aggregating their transcript counts. On data from human pancreatic islet tissue and peripheral blood mononuclear cells, we show that smoothing greatly facilitates the identification of clusters of cells and co-expressed genes. Using simulated datasets that closely mimic real expression data, we show that our algorithm drastically improves upon the accuracy of other smoothing methods. Our work implies that there exists a quantitative relationship between the number of cells profiled and the potential accuracy with which individual cell types or states can be characterized, and helps unlock the full potential of scRNA-Seq to elucidate molecular processes in healthy and disease tissues. Reference implementations of our algorithm can be found at <https://github.com/yanailab/knn-smoothing>.

Keywords: single-cell RNA-Seq, data analysis, k-nearest neighbors, Poisson distribution, algorithms

## INTRODUCTION

Over the past decade, single-cell expression profiling by sequencing (scRNA-Seq) technology has advanced rapidly. After the transcriptomic profiling of a single cell (Tang et al. 2009), protocols were developed that incorporated cell-specific barcodes to enable the efficient profiling of tens or hundreds of cells in parallel (Islam, Kjällquist, et al. 2011; Hashimshony, Wagner, et al. 2012). scRNA-Seq methods were then improved by the incorporation of unique molecular identifiers (UMIs) that allow the identification and counting of individual transcripts (e.g., Islam, Zeisel, et al. 2014; Hashimshony, Senderovich, et al. 2016). More recently, single-cell protocols were combined with microfluidic technology (Klein et al. 2015; Macosko et al. 2015; Zheng et al. 2017), combinatorial barcoding (Cao et al. 2017; Rosenberg et al. 2017), or nanowell plates (Gierahn et al. 2017). These high-throughput scRNA-Seq methods allow the cost-efficient profiling of tens of thousands of cells in a single experiment.

Due to the typically very low amounts of starting material, and the inefficiencies of the various chemical reactions involved in library preparation, scRNA-Seq data is inherently noisy (Ziegenhain et al. 2017). This has motivated the development of many specialized statistical models, for example for determining differential expression (Kharchenko, Silberstein, and Scadden 2014), performing factor analysis (Pierson and Yau 2015), pathway analysis (Fan et al. 2016), or more general modeling of scRNA-Seq data (Risso et al. 2017). In addition, methods have been proposed to impute missing values (W. V. Li and J. J. Li 2017) and to perform smoothing (Dijk et al. 2017). Finally, many authors of scRNA-Seq studies have relied on ad-hoc approaches for mitigating noise, for example by clustering and averaging cells belonging to each cluster (Shekhar et al. 2016; Baron et al. 2016).

Fundamental to any statistical treatment are the assumptions that are made about the data. For

47 methods aimed at analyzing scRNA-Seq data, assumptions about the noise characteristics determine  
48 which approach can be considered the most appropriate. All aforementioned approaches have assumed  
49 an overabundance of zero values, compared to what would be expected if the data followed a Poisson  
50 or negative binomial distribution. However, in the absence of true expression differences, the analysis  
51 by [Ziegenhain et al. \(2017\)](#) has suggested that across scRNA-Seq protocols, there is little evidence of  
52 excess-Poisson variability when expression is quantified by counting unique UMI sequences (“UMI  
53 filtering”) instead of raw reads (see Figure 5B in [Ziegenhain et al. \(2017\)](#)). This is consistent with reports  
54 describing individual UMI-based scRNA-Seq protocols, which have demonstrated that in the absence of  
55 true expression differences, the mean-variance relationship of genes or spike-ins closely follows that of  
56 Poisson-distributed data ([Grün, Kester, and Oudenaarden 2014](#); [Klein et al. 2015](#); [Zheng et al. 2017](#)).

57 In this work, we propose a smoothing algorithm that makes direct use of the observation that after  
58 normalization to account for efficiency noise ([Grün, Kester, and Oudenaarden 2014](#)), the technical noise  
59 associated with UMI counts from high-throughput scRNA-Seq protocols is entirely consistent with  
60 Poisson statistics. Instead of developing a parametric model, we propose an algorithm that smoothes  
61 scRNA-Seq data by aggregating gene-specific UMI counts from the  $k$  nearest neighbors of each cell.  
62 To accurately determine these neighbors, we propose to use an appropriate variance-stabilizing trans-  
63 formation, and to proceed in a step-wise fashion using partially smoothed profiles. Conveniently, the  
64 noise associated with the smoothed expression values is again Poisson-distributed, which simplifies their  
65 variance-stabilization and downstream analysis. We demonstrate the improved signal-to-noise ratio of  
66 scRNA-Seq data processed with our algorithm on real-world examples, and perform simulation studies  
67 to compare its accuracy to that of two other recently proposed methods for smoothing (or imputing)  
68 scRNA-Seq data ([Dijk et al. 2017](#); [W. V. Li and J. J. Li 2017](#)).

## 69 RESULTS

### 70 The normalized UMI counts of replicate scRNA-Seq profiles are Poisson-distributed

71 To validate the Poisson-distributed nature of high-throughput scRNA-Seq data in the absence of true  
72 expression differences, we obtained data from control experiments conducted on three platforms: in-  
73 Drop ([Klein et al. 2015](#)), Drop-Seq ([Macosko et al. 2015](#)), and 10x Genomics ([Zheng et al. 2017](#)). In  
74 these experiments, droplets containing identical RNA pools were analyzed. Assuming that the number of  
75 transcripts in each droplet was sufficiently large, there are no true expression differences among droplets,  
76 and all of the observed differences among droplets can be attributed to technical noise arising from  
77 library preparation and sequencing. As expected from published results (cf. Figure 5A in [Klein et al.](#)  
78 [\(2015\)](#), Supplementary Figure 2f in [Zheng et al. \(2017\)](#)), data from both the inDrop platform and the 10x  
79 Genomics platform followed the Poisson distribution (see [Figure 1a,c](#); see [Methods](#)), with the exception  
80 of highly expressed genes, which is likely due to global droplet-to-droplet differences in capture efficiency,  
81 previously referred to as “efficiency noise” ([Grün, Kester, and Oudenaarden 2014](#)).

82 For the Drop-Seq data, [Macosko et al. \(2015\)](#) did not discuss the mean-variance relationship, but  
83 we observed a pattern consistent with inDrop and 10x Genomics data (see [Figure 3b](#)). Interestingly, the  
84 y axis intercept of the Drop-Seq CV-mean relationship was clearly above 0, suggesting that transcript  
85 counts followed a scaled Poisson distribution (see [Methods](#)). A possible explanation could be that the  
86 computational pipeline used to derive the Drop-Seq UMI counts generated artificially inflated transcript  
87 counts, but we did not explore this hypothesis further.

88 To test whether the larger-than-expected variance of highly expressed genes can indeed be explained  
89 by efficiency noise, we normalized the expression profiles in each dataset to the median UMI count across  
90 profiles (Model I in [Grün, Kester, and Oudenaarden \(2014\)](#); see [Methods](#)). This resulted in an almost  
91 perfectly linear CV-mean relationship (see [Figure 1d-f](#)), suggesting that efficiency noise is indeed the  
92 dominating source of variation for very highly expressed genes.

93 Finally, we directly compared the frequency of UMI counts of zero for each gene to that predicted by  
94 Poisson statistics, and found that for the inDrop and 10x Genomics data, the observed values matched the  
95 theoretical prediction almost perfectly (see [Figure 3g,i](#)). For the Drop-Seq data, the frequency of zeros  
96 was slightly shifted upwards across the entire expression range (see [Figure 3h](#)), which may be due to  
97 artificially inflated UMI counts (see [Methods](#)).

98 In summary, we found that for all three high-throughput scRNA-Seq platforms examined, Poisson-  
99 distributed noise, in combination with the efficiency noise observed for very highly expressed genes,  
100 described virtually all of the observed technical variance, and that there was no evidence of substantial

101 zero-inflation. We note that the recent publication describing the Quartz-Seq2 single-cell platform also  
102 reports a Poisson noise relationship (see Figure 2e in [Sasagawa et al. \(2017\)](#)), bringing the total number  
103 of high-throughput scRNA-Seq protocols with reported Poisson noise characteristics to four.

### 104 **Aggregation of $n$ replicate profiles results in Poisson-distributed values with the signal-** 105 **to-noise ratio increased by a factor of $\sqrt{n}$**

106 Since the sum of independent Poisson-distributed variables is again Poisson-distributed, we reasoned that  
107 the aggregation of normalized expression values from  $n$  independent measurements of the same RNA  
108 pool would result in Poisson-distributed values, with the signal-to-noise ratio increased by a factor of  $\sqrt{n}$   
109 (see [Methods](#)). Similarly, we predicted that averaging instead of aggregating (summing) would result in a  
110 scaled Poisson distribution with the same increased signal-to-noise ratio. We tested this idea on the inDrop  
111 pure RNA dataset previously shown in [Figure 1a](#), which consisted of 935 expression profiles. Averaging  
112 randomly selected, non-overlapping sets of 16 profiles resulted in 58 new expression profiles, with genes  
113 exhibiting an almost exact four-fold increase in their signal-to-noise ratios, i.e., a four-fold reduction of  
114 their coefficients of variation, as expected (see [Figure 2a](#)). As an example, the UMI count distribution of  
115 the *GADPH* gene before and after averaging is shown in [Figure 2b](#), and can be seen to closely match the  
116 theoretically predicted Poisson and scaled Poisson distributions, respectively. In summary, the results  
117 showed that independently of gene expression level, aggregating expression values from replicate profiles  
118 led to more accurate expression estimates that again exhibited Poisson-distributed noise profiles.

### 119 **The Freeman-Tukey transform effectively stabilizes the technical variance of high-** 120 **throughput scRNA-Seq data**

121 Based on the aforementioned results, we conceived an algorithm to smooth single-cell RNA-seq data,  
122 with the following outline:

- 123 • For each cell  $C$ :
  - 124 1. Determine the  $k$  nearest neighbors of  $C$ .
  - 125 2. Calculate a smoothed expression profile for  $C$  by combining its UMI counts with those of the  
126  $k$  nearest neighbors, on a gene-by-gene basis.
  - 127 3. (Optional) Divide  $C$ 's new expression profile by  $k + 1$ , to retain the scale of the original data.

128 The main challenge in implementing this algorithm is to devise an appropriate approach for determin-  
129 ing the  $k$  nearest neighbors of each cell, and to choose an appropriate  $k$ . We defer the question of how to  
130 choose  $k$  to the [Discussion](#), and focus here on the problem of determining the  $k$  nearest neighbors.

131 Due to the Poisson-distributed nature of scRNA-Seq data, the technical variance (noise) associated  
132 with each gene is directly proportional to its expression level. This type of extreme heteroskedasticity  
133 poses a problem when attempting to calculate cell-cell similarities, because the noise of highly expressed  
134 genes can drown out the true expression differences of more lowly expressed genes, therefore strongly  
135 biasing the analysis towards the most highly expressed genes. One strategy to address this issue is the  
136 application of an appropriate variance-stabilizing transformation, designed to render the technical variance  
137 independent of the gene expression level ([Love, Huber, and Anders 2014](#)). For bulk RNA-Seq data, a  
138 log-TPM (or log-RPKM) transform is commonly used for this purpose, even though lowly expressed  
139 genes will still exhibit unduly large variances under this transformation ([Love, Huber, and Anders](#)  
140 [2014](#)). Based on our results, we reasoned that for scRNA-Seq data, the *Freeman-Tukey transform* (FTT),  
141  $y = \sqrt{x} + \sqrt{x + 1}$ , would be a more appropriate choice, as it is designed to stabilize the variance of  
142 Poisson-distributed variables ([Freeman and Tukey 1950](#)).

143 To compare the abilities of the FTT and the log-TPM (transcripts per million) transform to stabilize  
144 the technical variance of scRNA-Seq data, we applied both transformations to the inDrop pure RNA  
145 dataset, and found that the FTT produced significantly better results (see [Figure 3](#)): With the log transform,  
146 genes with low-intermediate expression, which we considered to be those with expression values between  
147 the 60th and 80th percentile rank (of all protein-coding genes, not only genes expressed by K562 cells),  
148 had between three- and ten-fold higher levels of variance than the 10% most highly expressed genes  
149 (see [Figure 3b](#)). In contrast, with the FTT, the difference was no larger than two-fold, and the variances of  
150 lowly expressed genes were biased downwards, not upwards (see [Figure 3c](#)). Moreover, we found that the

151 FTT also stabilized the variance of the aggregated profiles (see [Figure 3d-f](#)), which was expected, given our  
152 earlier observation that the aggregated UMI counts are again Poisson-distributed. In particular, a greater  
153 share of genes now had variances close to 1. This closely mirrored theoretical results, according to which  
154 the variance Poisson-distributed variables with mean  $\lambda \geq 1$  should be within 6% of the asymptotic value  
155 of 1 after FTT ([Freeman and Tukey 1950](#)). In summary, our analysis showed that distance calculations  
156 performed on Freeman-Tukey transformed (FT-transformed) UMI counts would give similar weight to  
157 genes with intermediate and high expression. Expression differences from lowly expressed genes would  
158 tend to be suppressed, but this suppression would become less severe for aggregated expression profiles.

### 159 **A k-nearest neighbor algorithm for smoothing scRNA-Seq data**

160 The previously discussed ideas suggested that a simple way to determine the  $k$  nearest neighbors for all  
161 cells would be to normalize their expression profiles, apply the FTT, and then find the  $k$  closest cells  
162 for each cell based on the Euclidean metric. However, we reasoned that this simple approach could be  
163 improved upon, because the noisiness of the data itself can interfere with the accurate determination of  
164 the  $k$  nearest neighbors. We therefore instead decided to adopt a step-wise approach, whereby initially,  
165 each profile is only minimally smoothed (using  $k_1 = 1$ ). In the second step, a larger set of nearest  
166 neighbors (e.g.,  $k_2 = 3$ ) is identified for each cell based on those minimally smoothed profiles, and the  
167 raw data is then smoothed using these larger sets of neighbors. Additional steps using increasing  $k_i$  are  
168 performed until the desired degree of smoothing is reached (i.e.,  $k_i = k$ ). By choosing the  $i$ 'th step to  
169 use  $k_i = \min\{2^i - 1, k\}$ , each step theoretically improves the signal-to-noise ratio of each individual  
170 expression measurement by a factor of  $\sqrt{2}$  — except for the last step, for which the improvement  
171 can be smaller —, and only a small number of steps are required even for large choices of  $k$  (e.g.,  
172 six steps for  $k = 63$ ). The resulting “kNN-smoothing” algorithm is formalized in [Algorithm 1](#) (see  
173 <https://github.com/yanailab/knn-smoothing> for reference implementations in Python,  
174 R, and Matlab). Using simulation studies, we found that in contrast to a simple “one-step” algorithm, the  
175 step-wise approach resulted in a significantly more accurate selection of neighbors, especially for large  $k$   
176 (see below).

### 177 **Application of kNN-smoothing to scRNA-Seq data of human pancreatic islets improves 178 clustering results and recovers specific expression patterns for marker genes**

179 To test whether kNN-smoothing would improve the ability to distinguish between different cell types  
180 in a scRNA-Seq experiment, we applied the algorithm (with  $k=15$ ) to a single-cell expression dataset  
181 obtained from human pancreatic islet tissue, containing at least 14 distinct cell populations ([Baron et al.  
182 2016](#)) (PANCREAS dataset). We first performed principal component analyses (PCA; see [Methods](#))  
183 and observed several improvements after smoothing (see [Figure 4a](#)): First, cell type clusters appeared  
184 significantly more compact in principal component space, indicating that the smoothed expression profiles  
185 were more similar than unsmoothed profiles for cells of the same type, but more different for cells from  
186 distinct types. Second, a single cluster of cells that contained alpha cells as well as other cells separated  
187 into two highly distinct clusters after smoothing. Notably, all alpha cells were still contained within a  
188 single cluster after smoothing. This suggested smoothing helped reveal important differences that were  
189 not previously captured by the first two principal components. Third, the proportion of cells of each type  
190 that could be identified using simple marker gene expression thresholds increased slightly, suggesting  
191 that the expression values of individual marker was less noisy in the smoothed data. Finally, a much  
192 greater share of total variation was explained by the first two principal components (PCs) for the smoothed  
193 data than for the unsmoothed data (40.3% vs 20.8%), which would be consistent with a greater share of  
194 variation originating from true biological differences rather than technical noise.

195 We next performed hierarchical clustering on the smoothed data after filtering for the 1,000 most  
196 variable genes (see [Methods](#)). When we visualized the results as an expression heatmap ([Eisen et al.  
197 1998](#)), several gene and cell clusters were readily discernible (see [Figure 4b](#)). A direct comparison  
198 between the smoothed and unsmoothed data showed that smoothing produced significantly less noisy  
199 expression patterns while preserving expression differences between relatively similar cell populations  
200 (see [Figure 4c](#)). To assess whether cell clusters delineated different cell types, we examined the expression  
201 patterns of known marker genes for nine cell types present in the data ([Baron et al. 2016](#)), and found  
202 that the hierarchical clustering of the smoothed expression profiles accurately grouped cells by their cell  
203 type (see [Figure 4d](#), top panel). Moreover, compared to the unsmoothed data, the expression patterns of  
204 these marker genes appeared significantly less noisy (see [Figure 4d](#), bottom panel). Finally, we repeated

---

**Algorithm 1:** K-nearest neighbor smoothing for UMI-filtered scRNA-Seq data

---

**Input:**

$p$ , the number of genes.  
 $n$ , the number of cells.  
 $X$ , a  $p \times n$  matrix containing the UMI counts for all genes and cells.  
 $k$ , the number of neighbors to use for smoothing.

**Output:**

$S$ , a  $p \times n$  matrix containing the smoothed (aggregated) UMI counts.

```

1: procedure KNN-SMOOTH( $p, n, X, k$ )
2:    $S = \text{COPY}(X)$ 
3:    $steps = \lceil \log_2(k + 1) \rceil$ 
4:   for  $t = 1$  to  $steps$  do
5:      $M = \text{MEDIAN-NORMALIZE}(S)$  // a new  $p \times n$  matrix
6:      $F = \text{FREEMAN-TUKEY-TRANSFORM}(M)$  // a new  $p \times n$  matrix
7:      $D = \text{PAIRWISE-DISTANCE}(F)$  // a new  $n \times n$  matrix
8:      $A = \text{ARGSORT-ROWS}(D)$  // a new  $n \times n$  matrix
9:      $k\_step = \text{MIN}(\{2^t - 1, k\})$ 
10:    for  $j = 1$  to  $n$  do // empty matrix  $S$ 
11:      for  $i = 1$  to  $p$  do
12:         $S_{ij} = 0$ 
13:      end for
14:    end for
15:    for  $j = 1$  to  $n$  do // go over all cells
16:      for  $v = 1$  to  $k\_step + 1$  do // go over all nearest neighbors (including self)
17:         $u = A_{jv}$ 
18:        for  $i = 1$  to  $p$  do // aggregate original UMI counts for each gene
19:           $S_{ij} = S_{ij} + X_{iu}$ 
20:        end for
21:      end for
22:    end for
23:  end for
24:  return  $S$ 
25: end procedure

```

Notes: For a two-dimensional matrix  $X$ ,  $X_{ij}$  refers to the element in the  $i$ 'th row and  $j$ 'th column of  $X$ .  $\text{COPY}(X)$  returns an independent memory copy of  $X$  (not a reference).  $\text{MEDIAN-NORMALIZE}(X)$  returns a new matrix of the same dimension as  $X$ , in which the values in each column have been scaled by a constant so that the column sum equals the median column sum of  $X$ .  $\text{FREEMAN-TUKEY-TRANSFORM}(X)$  returns a new matrix of the same shape as  $X$ , in which all values have been Freeman-Tukey transformed ( $f(x) = \sqrt{x} + \sqrt{x+1}$ ).  $\text{PAIRWISE-DISTANCE}(X)$  computes the pair-wise distance matrix  $D$  from  $X$ , so that  $D_{ij}$  is the Euclidean distance between the  $i$ 'th column and the  $j$ 'th column of  $X$ . For a matrix  $D$  with  $n$  columns,  $\text{ARGSORT-ROWS}(D)$  returns a matrix of indices  $A$  that sort  $D$  in a row-wise manner, i.e.,  $D_{jA_{j1}} \leq D_{jA_{j2}} \leq \dots \leq D_{jA_{jn}}$  for all  $j$ .

---

205 the entire analysis on the unsmoothed data, and found that it was considerably more difficult to discern  
206 clusters of genes and cells (see Figure S1a), and that judging by the expression patterns of the marker  
207 genes, not all cell types were clustered together appropriately (see Figure S1b). In summary, our analyses  
208 showed that kNN-smoothing with  $k=15$  significantly improved the results obtained with PCA as well as  
209 hierarchical clustering, and that it recovered stable and cell type-specific expression patterns for all of the  
210 marker genes examined.

## 211 **Application of kNN-smoothing to scRNA-Seq data of human peripheral blood mononu-** 212 **clear cells recovers robust expression profiles for diverse immune cell populations**

213 As a second test of our algorithm, we applied kNN-smoothing to a dataset containing scRNA-Seq data  
214 for 4,340 peripheral blood mononuclear cells (PBMCs), obtained using the 10x Genomics "Chromium"  
215 protocol (the PMBC dataset; see [Methods](#)). PBMCs can easily be obtained from peripheral blood, have  
216 been studied extensively, and contain a diverse set of immune cell types ([Kleiveland 2015](#)), thus enjoying  
217 popularity as a point of reference for scRNA-Seq studies (e.g., [Zheng et al. 2017](#); [Gierahn et al. 2017](#)).  
218 The identification and characterization of immune cell types in peripheral blood using scRNA-Seq  
219 is also an activate area of investigation (e.g., [Villani et al. 2017](#)). Since the PMBC dataset contained  
220 significantly more cells than the PANCREAS dataset, and the expression profiles exhibited significantly  
221 higher complexity (i.e., expression levels were less concentrated on a few highly expressed genes; data  
222 not shown), we chose to apply more aggressive smoothing using  $k=127$ . We compared the results of  
223 PCA applied before and after smoothing, and found that, again, smoothing significantly improved the  
224 compactness of cell type clusters in principal component space, and strongly increased the fraction of  
225 variance explained by the first two PCs — this time, from 16.6% to 70.4%. Moreover, using expression  
226 thresholds for individual marker genes (see below), we were able to assign one of four major cell type  
227 identities (T cells, CD14 monocytes, B cells, and dendritic cells) to 93% of all cells in the smoothed data.  
228 However, in the unsmoothed data, the technical noise was so strong that only 40% of the cells could be  
229 assigned an identity using the same expression thresholds (see [Figure 5a](#)).

230 Next, we performed hierarchical clustering after filtering for the 1,000 most variable genes, visualized  
231 the results as a heatmap, and obtained several easily distinguishable clusters of cells and genes, providing  
232 an overview of the heterogeneity in the data (see [Figure 5b](#)). Repeating the same clustering procedure on  
233 the unsmoothed data produced much less coherent clusters (see [Figure S2](#)). We compared the smoothed  
234 and unsmoothed data within a small region of the heatmap in a side-by-side comparison and observed that  
235 smoothing dramatically reduced the apparent noise levels, while largely preserving differences between  
236 similar sets of cells (see [Figure 5c](#)). Finally, we compiled a list of marker genes for the major cell  
237 types found in PBMC samples, including T cells, monocytes, B cells, NK cells, and dendritic cells  
238 (see [Methods](#)). In comparing the expression patterns of these genes across cells ordered according to  
239 the hierarchical clustering results, we found that smoothed resulted in vastly more stable expression  
240 patterns, while the expression of each marker gene appeared to remain confined to a specific subset of  
241 cells. A comparison with the full heatmap suggested that within most cell types, there existed significant  
242 population substructure. For example, several distinct clusters of cells were apparent among the set of  
243 T cells expressing *CD3D* and *CD3E*, which likely distinguish specific subsets such as CD4+ and CD8+  
244 T cells, or naive and memory T cells. However, a more detailed analysis of the individual immune cell  
245 subsets was beyond the scope of this work. In summary, the application of aggressive smoothing (with  
246  $k=127$ ) to PBMC data led to significant improvements in the ability to cluster cells by their cell type, and  
247 produced stable and cell type-specific expression patterns for marker genes, thus demonstrating  
248 the applicability of kNN-smoothing to data generated using 10x Genomics' high-throughput scRNA-Seq  
249 solution.

## 250 **Comparison with other smoothing methods on simulated datasets shows strongly im-** 251 **proved performance of kNN-smoothing**

252 To quantitatively compare the accuracy of kNN-smoothing with that of other smoothing methods, we  
253 devised an approach for simulating scRNA-Seq datasets containing a mixture of cell types. Our idea was  
254 to base each simulation on a real scRNA-Seq dataset, in order to make the simulated data as similar to real  
255 scRNA-Seq expression data as possible, both biologically and technically. To ensure biological similarity,  
256 we simulated clusters with expression profiles obtained from the real data, based on hierarchical clustering  
257 results. To ensure technical fidelity, we simulated Poisson-distributed sampling noise, modeled on top  
258 of efficiency noise, the distribution of which was again obtained from the real data (see [Methods](#) for  
259 details). We generated two datasets, SIM-PANCREAS (based on the PANCREAS dataset) and SIM-PBMC  
260 (based on the PMBC dataset). A visual comparison based on clustered heatmaps illustrated the similarity  
261 between real and simulated scRNA-Seq data (see [Figures S3](#) and [S4](#)). We then applied kNN-smoothing,  
262 MAGIC ([Dijk et al. 2017](#)), and scImpute ([W. V. Li and J. J. Li 2017](#)) to the two datasets, and quantified the  
263 similarity of the results to the true cluster profiles from which the cell expression profiles were generated.

264 We tested different parameter settings for each method, and observed that as expected, the choice of  $k$

265 had a large effect on the accuracy of the results obtained with kNN-smoothing (see Figure 6). However,  
266 for all values of  $k \geq 15$  that we tested (up to  $k=511$ ), kNN-smoothing outperformed MAGIC and scImpute  
267 on both datasets by a large margin, independently of the way in which we quantified accuracy. We first  
268 quantified the relative accuracy of each cell's expression profile by calculating its Pearson correlation  
269 coefficient (PCC) with the true cluster expression profile, on  $\log_2$ -transformed data. For kNN-smoothing  
270 with  $k=15$ , the median PCC across all cells in the SIM-PANCREAS dataset was approx. 0.93. For  $k=63$ ,  
271 it was approx. 0.98. In contrast, the best values obtained by MAGIC and scImpute across all parameter  
272 settings were approx. 0.85 and 0.87, respectively (see Figure 6a). These differences were even more  
273 pronounced for the SIM-PBMC dataset (see Figure 6c), and when we quantified absolute accuracies  
274 by root-mean squared error (RMSE) on log-transformed data (see Figure 6b,d). We then quantified  
275 accuracies, using both PCC and RMSE, on square root-transformed data instead of  $\log_2$ -transformed data.  
276 This resulted in slightly smaller absolute differences, but we again observed that kNN-smoothing clearly  
277 outperformed the other methods for  $k \geq 15$  (see Figure S5).

278 Our evaluation of kNN-smoothing on simulated data also showed that up to a certain point, choosing  
279 larger values of  $k$  produced increasingly accurate expression profiles. In fact, the median PCC for  $k=511$   
280 was very close to 1 in the SIM-PBMC dataset (see Figure 6c). However, the best median PCC for the  
281 SIM-PANCREAS dataset was obtained for  $k=255$ , and a significant fraction of cells exhibited much lower  
282 accuracies for  $k=255$  and  $k=511$  compared to  $k=127$  (see Figure 6a). This apparent "over-smoothing" was  
283 not surprising, since a significant fraction of cells in the SIM-PANCREAS dataset belonged to clusters  
284 that were represented by less than 256 cells. Therefore, some of the 255 neighbors selected for these  
285 cells had to belong to other clusters, and using their expression values for smoothing resulted in less  
286 accurate expression profiles. To confirm that cluster size determined whether or not cells benefitted from  
287 smoothing with very large  $k$ , we examined the average accuracies of cells from the three largest and  
288 smallest clusters for different  $k$ . In both datasets, we observed that as predicted, accuracies started to drop  
289 off whenever  $k$  was chosen larger than the cluster size (see Figure 6e,f).

290 To obtain a more detailed view of the results of kNN-smoothing, MAGIC, and scImpute, we selected  
291 a representative cell from the largest cluster in the PANCREAS dataset ( $n=662$ ), and examined the  
292 correlation of the smoothed profiles with the true cluster profile using scatter plots. For kNN-smoothing,  
293 we examined the results for  $k=15$  and  $k=511$ , whereas for MAGIC and scImpute, we picked the parameter  
294 settings that achieved the best median PCC across all cells. The correlations for this particular cell  
295 mirrored the overall results (see Figure 6g-j), which showed that kNN-smoothing with either setting of  $k$   
296 produced more highly correlated profiles than either of the two other methods. However, whereas the  
297 PCC for both MAGIC and scImpute was 0.88, the values reported by MAGIC were merely noisy and  
298 non-linear, while the scImpute results also exhibited some obvious smoothing artifacts (see Figure 6j).

299 Finally, we observed that for  $k=3$ , the median PCC of kNN-smoothing was sometimes lower than  
300 that for  $k=1$ . We believe this surprising result is related to size biases by the algorithm in the selection  
301 of neighbors (cells) to be used for smoothing (further discussed below). In conclusion, our evaluation  
302 of different smoothing methods on two simulated datasets showed that kNN-smoothing outperformed  
303 the other methods by a large margin for most choices of  $k$ , and in some cases recovered cell expression  
304 profiles with near-perfect accuracy.

### 305 **Other variants of kNN-smoothing are less accurate and exhibit stronger size selection** 306 **bias in simulated datasets**

307 In the design of our smoothing algorithm, we made several decisions based on theoretical considerations,  
308 as well as our intuitions. We therefore aimed to examine whether the performance of the resulting  
309 algorithm retrospectively validated these decisions. Specifically, we aimed to compare the kNN-smoothing  
310 algorithm to a variant in which neighbors are identified in a single step, as opposed to a step-wise approach.  
311 Second, we aimed to test whether the choice of calculating cell-cell distances on median-normalized and  
312 FT-transformed data performed better than using a more commonly employed log-TPM transform. We  
313 refer to these two variants as the "single-step" variant and the "log-TPM" variant, respectively.

314 To test the accuracy of the different variants of the smoothing algorithm, we again relied on our  
315 simulated datasets (see above), and determined, for a range of different  $k$ , the fraction of cells with  
316 incorrect neighbors for each variant. We found that the log-TPM variant performed very poorly in both  
317 datasets, resulting in approximately 80% and 20%, respectively, of cells having an incorrect neighbor  
318 even for  $k = 1$  in SIM-PANCREAS and SIM-PBMC (see Figure 7a,b). The "one-step" variant performed

319 generally worse than the step-wise variant, with the exception of  $k = 15$  and  $k = 31$  in the SIM-PBMC  
320 dataset.

321 Over the course of our simulation experiments, we noticed that the average “sizes” (total UMI counts)  
322 of the smoothed “cells” (expression profiles) sometimes deviated significantly from the true UMI count of  
323 each cluster, which could only be explained by a size bias in the way in which neighbors were selected for  
324 each cell (the sizes of cells belonging to the same cluster varied due to our simulation of efficiency noise;  
325 see [Methods](#)). To examine whether kNN-smoothing and the two variants exhibited different size biases,  
326 we compared the distribution of smoothed profile sizes for a range of different  $k$ , focusing only on cells  
327 from the largest cluster in each dataset (see [Figure 7c,d](#)). We found that the algorithms exhibited strikingly  
328 different behaviors. Most notably, the one-step variant exhibited a strong systematic bias towards selecting  
329 “large” cells as neighbors (i.e., cells with a large total UMI count), resulting in smoothed cells that on  
330 average contained a much larger UMI count than the cluster profile that was used as the basis for the  
331 simulation of these cells. Since the first step of kNN-smoothing is identical to that of one-step smoothing  
332 with  $k=1$ , it shared this bias for large cells in its first step. Astonishingly, the opposite was true for  
333 neighbors selected in its second step ( $k = 3$ ), when smoothed cells exhibited smaller-than-average sizes.  
334 However, by the fourth step ( $k = 15$ ), the average sizes were very close to the true cluster values in both  
335 datasets. The log-TPM variant exhibited similar behavior, but the distribution of sizes was generally much  
336 more spread out. Based on theoretical considerations, we think that it is undesirable for an algorithm  
337 to exhibit an overly strong size bias, as it will make very uneven use of the information available (see  
338 [Discussion](#)). We therefore believe that the near-convergence of the average cell size to the true cluster  
339 UMI count, as achieved by the kNN-smoothing algorithm for  $k \geq 15$ , represents a desirable property that  
340 again makes kNN-smoothing preferable to the algorithm variants examined. In summary, our evaluation  
341 of the effects of our initial design decisions validated those decisions, as they resulted in an algorithm that  
342 provides more accurate results, and makes more even use of information from cells that differ in their  
343 total UMI counts (e.g., due to efficiency noise).

## 344 **A Python implementation of kNN-smoothing processes datasets containing thousands** 345 **of cells within a few minutes**

346 For an analysis method to be of practical use, it not only needs to provide accurate results, but it must also  
347 finish in a reasonable amount of time. We therefore measured the runtime of our Python implementation  
348 of kNN-smoothing on Chromium PBMC data containing 21,425 expressed genes, using subsampling  
349 to test datasets with sizes ranging from  $n=2,000$  to  $n=8,000$  cells, on a laptop with an Intel® Core™  
350 i7-6600U processor and 20 GiB of memory (see [Methods](#)). We found that the runtime ranged from a  
351 few seconds to just over 14 minutes (for  $k=511$  and  $n=8,000$ ), and that runtime increased linearly with  
352  $k$  (see [Figure 8a](#)). The two phases of the algorithm have different time complexities with respect to  $n$ :  
353 The identification of neighbors has a complexity of  $\mathcal{O}(n^2)$  (as it requires the calculation of distances  
354 between all pairs of cells), whereas the smoothing part has a complexity of  $\mathcal{O}(n)$  (as it simply requires  
355 the aggregation of UMI counts for all cells). Accordingly, we observed that as the size of the dataset  
356 increased, the first phase (identification of neighbors) consumed an increasingly large fraction of the total  
357 runtime (data not shown).

358 We also calculated the memory footprint of our Python implementation, which requires three copies of  
359 the expression matrix (original, smoothed, smoothed and transformed) and two  $n$ -by- $n$  arrays (the distance  
360 matrix and a sorted indexing array) to be held in memory. We assumed that each expression measurement  
361 would be represented in memory by an 8-byte floating point value. From the results [Figure 8b](#), it appears  
362 that for datasets containing approx. 20,000 protein-coding genes, the largest datasets that can be analyzed  
363 (without memory swapping) contain approx. 5k, 10k, and 20k cells, for computers with 4 GiB, 8 GiB,  
364 and 16 GiB of memory, respectively. Overall, these results demonstrate that kNN-smoothing can be run  
365 on most laptops and PCs for datasets containing several thousand cells, in a time-span of minutes or even  
366 seconds.

## 367 **DISCUSSION**

### 368 **Importance of smoothing for the analysis of scRNA-Seq data**

369 In this work, we have proposed *k-nearest neighbor smoothing* (kNN-smoothing), a novel algorithm for  
370 smoothing high-throughput scRNA-Seq data, aimed at significantly improving the signal-to-noise ratios  
371 of the gene expression values for each cell by aggregating information from similar cells (“neighbors”). It



372 might appear that by smoothing single-cell data, one is compromising on important information pertaining  
373 to the individuality of each cell. We note that while cell-to-cell variation within a given cell type is of  
374 clear importance, in most applications one is querying for cell populations that are each represented by an  
375 appreciable number of cells. Thus, given the routine profiling of thousands or even tens of thousands of  
376 cells, and the inherent noisiness of the data under study, our smoothing algorithm offers a clear advantage  
377 in terms of the identification of those populations.

378 We designed the kNN-smoothing algorithm based on the observation that data from multiple high-  
379 throughput scRNA-Seq protocols (including inDrop, Drop-seq, and 10x Genomics' Chromium) share  
380 common technical noise characteristics. Specifically, after the application of "median-normalization"  
381 to account for efficiency noise, the gene expression values in technical replicates are approximately  
382 Poisson-distributed. We believe that this is a direct consequence of the fact that all of these protocols  
383 only capture a small fraction of transcripts of each cell, employ 3'- or 5'-end counting ("tagging"), and  
384 avoid overcounting of amplified transcripts by UMI-filtering. Therefore, we predict that the Poisson noise  
385 characteristic applies to all such scRNA-Seq protocols that use UMI filtering, but not to other scRNA-Seq  
386 protocols. This idea clearly warrants a more detailed investigation, which is beyond the scope of this paper.  
387 Whatever the origins of the noise characteristics described here, the fact that they are shared between the  
388 aforementioned protocols implies that our proposed algorithm is in principle applicable to any dataset  
389 generated using those protocols.

390 We have demonstrated the application of kNN-smoothing to data generated using the inDrop (Klein  
391 et al. 2015) and Chromium (Zheng et al. 2017) protocols, and shown that in both cases, the algorithm was  
392 able to recover cell type-specific expression patterns for previously described marker genes. Moreover,  
393 the achieved noise reduction made it straightforward to apply hierarchical clustering (Eisen et al. 1998), a  
394 powerful method for exploratory analysis of gene expression data that performs poorly on unsmoothed  
395 scRNA-seq data. It also resulted in principal components capturing much larger fractions of total variance,  
396 and led to a significantly improved separation of individual cell populations along the first two principal  
397 components. This implies that kNN-smoothing has the potential to improve the performance of many  
398 advanced analysis methods that rely on PCA or other dimensionality reduction techniques, including  
399 methods for systematic exploratory analysis (e.g., Wagner 2015) and trajectory inference (e.g., Cao  
400 et al. 2017). Importantly, kNN-smoothing works by aggregating information across cells, rather than  
401 across genes. Therefore, it avoids the introduction of artificial gene-gene dependencies, which are  
402 highly problematic when downstream analyses involve methods whose null models assume independence  
403 between genes, such as GO enrichment analysis (Subramanian et al. 2005; Eden et al. 2009). At the same  
404 time, kNN-smoothing clearly introduces dependencies between cells. Naturally, the extent to which this  
405 is the case depends on the magnitude of  $k$ .

406 Recently, researchers and funding bodies have proposed the generation of "cell atlases", systematic  
407 efforts aimed at providing exhaustive molecular descriptions of all cell types and states present in human  
408 tissues under healthy as well as disease conditions such as cancer (Regev et al. 2017; *National Cancer*  
409 *Institute 2017; The Chan Zuckerberg Initiative 2018*). As scRNA-Seq is generally seen as an important  
410 experimental methodology for the realization of these projects, kNN-smoothing could represent a valuable  
411 analysis tool for the identification of novel cell types and states, as well as for the characterization of their  
412 expression profiles.

### 413 **How to choose $k$ ?**

414 The results obtained when applying kNN-smoothing to a particular dataset strongly depend on the choice  
415 of  $k$ . Choosing  $k$  very small might not adequately reduce noise. On the other hand, choosing  $k$  too large  
416 incurs the risk of smoothing over biologically relevant expression heterogeneity. Moreover, large  $k$  can  
417 also lead to artifactual expression profiles that consist of averages of profiles belonging to different cell  
418 populations. Our method provides no guarantee that a smoothed expression profile accurately reflects  
419 an existing cell population. During the exploratory phase of data analysis, we therefore recommend to  
420 test different choices of  $k$ . When a signal of interest has been identified (such as a gene-gene correlation,  
421 a cluster of cells, an expression signature, etc.), it can be determined what minimum value of  $k$  is  
422 required in order to obtain this signal. When this value is large, adequate controls should be performed to  
423 ensure that the observed signal is not a smoothing artifact.

424 An appropriate choice of  $k$  also depends on the particular application: When analyzing cells under-  
425 going a highly dynamic process (e.g., differentiation), large values of  $k$  might result in an overly coarse

426 picture of the transcriptomic changes. In contrast, when aiming to distinguish distinct cell types, larger  
427 choices of  $k$  can help identify robust expression profiles for each type.

### 428 **Comparison with previously reported methods**

429 Our algorithm combines a previously proposed normalization method (Grün, Kester, and Oudenaarden  
430 2014) with a standard variance-stabilizing transformation (VST) for Poisson-distributed data (Freeman  
431 and Tukey 1950). We are not aware of prior work suggesting the use of a VST in the context of smoothing  
432 scRNA-Seq data. Instead, most work has focused on parametric modeling (see Introduction). While  
433 these approaches can certainly be effective, our work suggests that they are not strictly necessary to  
434 effectively to address the issue of noise in scRNA-Seq data. Moreover, sophisticated models often require  
435 complex inference procedures, which can be difficult to implement correctly and efficiently. In contrast,  
436 our method requires only a few lines of code, while still being based on statistical theory, and our Python  
437 implementation runs in a matter of seconds or minutes on datasets containing a few thousand cells.

438 Simple aggregation or averaging of scRNA-Seq expression profiles has been previously employed in  
439 specific contexts, for example for library size normalization (Lun, Bach, and Marioni 2016). Recently,  
440 La Manno et al. (2017) employed a simple version of  $k$ -nearest neighbor smoothing (“pooling”) as part  
441 of a method designed to estimate the time derivative of mRNA abundance based on unspliced RNA  
442 sequences. The authors defined the most similar cells based on log-transformed data (for read counts  
443 from the SMART-Seq2 protocol), or PCA-transformed data (for UMI counts from inDrop and 10x  
444 Genomics protocols). However, they did not provide any justification for their choices of similarity  
445 metrics, a discussion of the statistical properties of the data before and after smoothing, or a quantification  
446 of the gain in expression accuracies achieved. Moreover, neither of these studies aimed to develop a  
447 general-purpose method to improve the signal-to-noise ratio of scRNA-Seq data, or employed a step-wise  
448 approach for defining the nearest neighbors, as we have done here. Our work can be compared to other  
449 recently proposed methods that aim to specifically address the issue of technical noise in scRNA-Seq  
450 data: Dijk et al. (2017) aimed to apply the idea of manifold learning using diffusion maps to scRNA-Seq  
451 data (see Supplementary Text for a demonstration of  $k$ NN-smoothing on one of the datasets analyzed in  
452 their study), and W. V. Li and J. J. Li (2017) developed an algorithm that borrows information among  
453 similar cells in order to “impute” the expression values of genes that in many cells exhibit UMI counts  
454 of exactly zero (“missing values”). Aside from the clear methodological differences between these two  
455 methods and  $k$ NN-smoothing, it is noteworthy that the respective study authors also made completely  
456 different assumptions about the noise characteristics of scRNA-Seq data. For their simulation studies,  
457 neither Dijk et al. (2017) and W. V. Li and J. J. Li (2017) generated Poisson-distributed expression data.  
458 Dijk et al. (2017) started from bulk microarray expression data, which was then “downsampled using an  
459 exponential distribution” to obtain specific proportions of zero values, while W. V. Li and J. J. Li (2017)  
460 defined gene-specific “dropout rate[s]”, and set individual expression values to zero using Bernoulli trials  
461 with those rates. Based on the results presented in this work, we believe that neither of these approaches  
462 faithfully reproduces the noise characteristics of UMI-filtered scRNA-Seq data.

### 463 **Use of simulation studies to quantify the accuracy of scRNA-Seq smoothing methods**

464 As scRNA-Seq is currently the only technology that can be used to interrogate complete transcriptomes  
465 of single cells in a highly parallelized fashion, there exist no “gold standard” datasets to benchmark  
466 scRNA-Seq smoothing algorithms (i.e., datasets that contain a heterogeneous mixture of cells whose true  
467 single-cell expression profiles have been determined using an orthogonal method). Therefore, one most  
468 resort to simulation studies in order to quantitatively assess the accuracies of smoothing methods. Here,  
469 we established a new method for using real scRNA-Seq datasets to simulate UMI-filtered scRNA-Seq data  
470 that consist of a mixture of cell types (clusters). The simulated data exhibit Poisson-distributed sampling  
471 noise, modeled on top of efficiency noise, for which we used the observed distribution of total UMI counts  
472 per cell in the real data. (This might result in an overestimate of efficiency noise, as some differences  
473 in total UMI counts could also reflect biological differences in total mRNA abundance and/or cell size.)  
474 Our methodology is based on the understanding of the sources and characteristics of technical noise in  
475 UMI-filtered scRNA-Seq data as described in this work, and a visual comparison between the real and the  
476 synthetic datasets led us to conclude that it can also reproduce the majority of the biological heterogeneity  
477 observed in the real dataset. For the analyses reported here, we decided to limit the simulations to  $K = 10$   
478 clusters, but the procedure is compatible with any integer choice of  $K$  for  $1 \leq K \leq n$  (where  $n$  is the  
479 number of cells in the real data), and the use of hierarchical clustering ensures consistency between

480 datasets generated using similar choices of  $K$  (e.g., for  $K = 11$ , one of the clusters present in the  $K = 10$   
481 dataset would be split into two distinct clusters, while all other clusters remain identical).

482 Based on the simulated data, we were able to show that with  $k \geq 7$ , kNN-smoothing produced much  
483 more accurate results for both simulated datasets, when compared to MAGIC (Dijk et al. 2017) and  
484 scImpute (W. V. Li and J. J. Li 2017). This was true for all MAGIC and scImpute parameter settings  
485 tested, independently of whether we quantified accuracy using both relative (PCC) or absolute (RMSE)  
486 measures, and independently of whether we used  $\log_2$ -transformed or square root-transformed expression  
487 values in these calculations. In some cases, kNN-smoothing was able to recover the true expression profile  
488 with near-perfect accuracy, which we never observed for either of the two other methods. Our results  
489 therefore suggest that kNN-smoothing generally outperforms MAGIC and scImpute on UMI-filtered  
490 scRNA-Seq data containing highly heterogeneous cell populations.

491 A limitation of our approach to simulating scRNA-Seq data is that it ignores certain biological sources  
492 of heterogeneity: For example, cells from the same cell type might be in different cell cycle phases, and  
493 these differences would be lost (averaged out) as part of the simulation procedure. More generally, our  
494 current approach is unable to simulate datasets that contain a mixture of cells from different stages of a  
495 continuous dynamic process (such as cell differentiation), and procedures that can simulate UMI-filtered  
496 scRNA-Seq data for those types of experiments need to be established in order to quantitatively evaluate  
497 the performance of smoothing methods in such scenarios.

### 498 **Implications for study design**

499 Based on the work described here, it is tempting to speculate that in theory, there is no limit as to  
500 how accurately the average expression profile of individual cell populations and sub-populations can be  
501 determined using scRNA-Seq. Our analysis suggests that the signal-to-noise ratio can always be improved  
502 by aggregating more profiles from “biologically identical” cells. In practice, however, the number of  
503 cells that can be analyzed is limited by the protocol used, the cost of the experiment, the number of  
504 cells available, and/or the rarity of the population of interest. Furthermore, the accuracy with which  
505 “biologically identical” cells can be identified based on their noisy profile depends on several factors,  
506 including the granularity required (e.g., can cells in different cell cycle stages be considered identical for  
507 the purpose of the analysis?), and the precise measure of similarity adopted. When the transcriptomic  
508 differences between cell populations of interest become too small to allow a reliable identification of  
509 neighbors, it is not clear how to perform smoothing and extract the true biological signal. In this work, we  
510 have determined similarity on the basis of the expression of all genes, but restricting this calculation to a  
511 subset of genes or employing different distance metrics could be more appropriate in certain settings.

512 More generally, the quadratic relationship between “cell coverage” (loosely defined as the average  
513 number of profiles obtained for each cell population) and potential quantification accuracy brings into  
514 focus the question of what constitutes an optimal number of sequencing reads per cell. While a quantitative  
515 treatment of this issue is beyond the scope of this work, it is clear that in many situations, it would be  
516 more beneficial to sequence additional cells, rather than increase the read coverage per cell. The precise  
517 optimum likely depends on numerous factors, and is difficult to determine without an examination of  
518 all the experimental, statistical, and computational factors involved in scRNA-Seq studies. However,  
519 since sequencing often represents the single most expensive part of the experiment, this question clearly  
520 warrants further investigation.

### 521 **Future directions**

522 In this work, we have used multiple datasets to demonstrate that PCA and hierarchical clustering, two  
523 basic techniques for analyzing gene expression data benefit strongly from kNN-smoothing. In future  
524 work, we hope to explore the effect of smoothing for additional types of analyses, including differential  
525 expression analysis, gene set enrichment analysis, or exploratory analysis using prior knowledge (Wagner  
526 2015). We anticipate that our kNN-smoothing algorithm will benefit all of these approaches, and generally  
527 enable the more effective analysis of scRNA-Seq data in wide variety of settings. It should again be noted,  
528 however, that smoothed expression profiles of cells are no longer statistically independent, so smoothing  
529 should not be used naively in combination with statistical tests for differential expression.

530 The use of a global  $k$  could limit the effectiveness of our algorithm in cases where different cell  
531 populations are present at very different abundances. As an extreme example, if one population constitutes  
532 5% of all cells, and another 95%,  $k$  should not be chosen larger than 5% of the total number of profiles, in  
533 order to avoid artifacts. However, the expression profile of the population present at 95% could benefit

534 from larger choices of  $k$ . It would therefore seem useful to automatically adjust  $k$  for each cell. This  
535 is the approach chosen by [Dijk et al. \(2017\)](#), who use the distance of a cell to its  $ka$ 'th neighbor as an  
536 important parameter in the calculation of the smoothed profile. However, a complication associated with  
537 this approach is that different expression profiles would exhibit distinct technical noise levels, since they  
538 would be the result of aggregating or averaging over different numbers of cells. Another way to address  
539 this issue would be to cluster cells by type before performing more aggressive smoothing.

540 High-throughput scRNA-Seq technology is widely believed to hold enormous potential for the analysis  
541 of heterogeneous tissues and dynamic cellular processes in health and disease. However, the inherent  
542 noisiness of the data means that greater computational efforts are required in order to realize this potential.  
543 Fortunately, data from different protocols exhibit very similar statistical properties, presumably due to  
544 their shared reliance on 5'- or 3'-end counting and UMI filtering. These properties should directly inform  
545 the design of effective algorithms for smoothing and analysis of scRNA-Seq data. We have described a  
546 generally applicable, easy-to-implement approach for improving the signal-to-noise ratio of single-cell  
547 expression profiles, which promises to significantly expand the realm of possibilities for downstream  
548 analyses of scRNA-Seq data.

## 549 METHODS

### 550 Download and processing of inDrop pure RNA replicate data

551 Raw sequencing data were downloaded from SRA (experiment accession [SRX863258](#)). In this experi-  
552 ment by [Klein et al. \(2015\)](#), droplets containing pure RNA extracted from K562 cells were processed  
553 using the inDrop protocol. The downloaded data were processed using a custom pipeline. Briefly, SRA  
554 data were converted to the FASTQ format using `fastq-dump`. Next, the "W1" adapter sequence of the  
555 inDrop RT primer were located in the barcode mate sequence (the first mate of the paired-end sequencing),  
556 by comparing the 22-mer sequences starting at positions 9-12 in the read with the known W1 sequence,  
557 allowing at most two mismatches. Reads for which the W1 sequence could not be located in this way  
558 were discarded. The start position of the W1 sequence was then used to infer the length of the first part  
559 of the inDrop cell barcode in each read, which can range from 8-11 bp, as well as the start position of  
560 the second part of the inDrop cell barcode, which always consists of 8 bp. Cell barcode sequences were  
561 mapped to the known list of 384 barcode sequences for each read, allowing at most one mismatch. The  
562 resulting barcode combination was used to identify the cell from which the read originated. Finally, the  
563 UMI sequence was extracted, and only with low-confidence base calls for the six bases comprising the  
564 UMI sequence (minimum PHRED score less than 20) were discarded. The mRNA mate sequences (the  
565 second mate of the paired-end-sequencing) were mapped to the human genome, release GRCh38, using  
566 STAR 2.5.3a with parameter `--outSAMmultNmax 1` and default parameters otherwise. Testing the  
567 overlap of mapped reads with exons of protein-coding genes and UMI-filtering was performed using  
568 custom Python scripts. Droplets (barcodes) were filtered for having a total UMI count of at least 10,000,  
569 resulting in a dataset containing UMI counts for 19,865 protein-coding genes across 935 droplets.

### 570 Download of 10x Genomics ERCC spike-in expression data

571 UMI counts for ERCC spike-in RNA processed using the 10x Genomics scRNA-Seq protocol ([Zheng  
572 et al. 2017](#)) were downloaded from the [10x Genomic website](#). The dataset consisted of UMI counts for 92  
573 spike-ins across 1,015 droplets.

### 574 Download of Drop-Seq ERCC spike-in expression data

575 UMI counts for ERCC spike-in RNA processed using the 10x Genomics scRNA-Seq protocol ([Macosko  
576 et al. 2015](#)) were downloaded from GEO accession number [GSM1629193](#). The dataset consisted of UMI  
577 counts for 80 spike-ins across 84 droplets.

### 578 Prediction of scRNA-Seq noise characteristics based on Poisson statistics

579 In this paper, we initially focus on the technical variation observed in scRNA-Seq data for droplets  
580 containing identical pools of pure mRNA. Let  $u'_{ij}$  be the observed UMI count for the  $i$ 'th gene (or ERCC  
581 spike-in) in the  $j$ 'th droplet, for  $i = 1, \dots, p$  and  $j = 1, \dots, n$ . Similarly, let  $U'_{ij}$  be a random variable  
582 representing the UMI count for the  $i$ 'th gene in the  $j$ 'th cell. We assume that  $U'_{ij}$  is Poisson-distributed  
583 with mean  $\lambda'_{ij} = m_i e_j$ , where  $m_i$  is the number of mRNA molecules present for the  $i$ 'th gene, and  $e_j$   
584 corresponding to the capture efficiency of the scRNA-Seq protocol for the  $j$ 'th droplet (both  $m_i$  and  $e_j$

are unknown). We further assume that  $U'_{i1}, \dots, U'_{in}$  are independent, for all  $i$ . For the sake of simplicity, we assume that the read coverage (the number of reads sequenced per cell) is infinite, so that there are no cases in which a transcript is not observed due to limited read coverage. In practice, limited read coverage will not invalidate the Poisson assumption, but result in lower “effective” capture efficiencies.

If all  $e_j$  were identical (say, equal to  $e^{\text{global}}$ ), then  $U'_{i1}, \dots, U'_{in} \stackrel{i.i.d.}{\sim} \text{Poisson}(\lambda'_i)$ , with  $\lambda'_i = m_i e^{\text{global}}$ . Grün, Kester, and Oudenaarden (2014) have proposed to normalize the expression profile of each cell to the median total UMI count across cells (Model I in Grün et al.), in order to counteract the differences in capture efficiency (“efficiency noise”). Median-normalization consists of calculating the total UMI count per profile (cell or droplet),  $t_j = \sum_i u'_{ij}$ , calculating the median  $t^{\text{med}} = \text{median}\{t_1, \dots, t_n\}$ , and then multiplying each  $u'_{ij}$  by the factor  $t^{\text{med}}/t_j$ .

Based on the results by Grün et al., we hypothesized that median-normalized data would be approximately Poisson-distributed, as long as the differences in capture efficiency were not too extreme. Therefore, we let  $N'_{i1}, \dots, N'_{in}$  represent the UMI counts for the  $i$ 'th gene after median-normalization, and assume them to be i.i.d.  $\text{Poisson}(\lambda'_i)$ .

For Poisson-distributed variables, the variance is always equal to the expectation (defined by  $\lambda$ ). Let  $N_i \sim \text{Poisson}(\lambda'_i)$ . For the coefficient of variation (CV) of  $N_i$ , we have:

$$CV(N_i) = \frac{\sqrt{\text{var}(N_i)}}{E(N_i)} = \frac{\sqrt{E(N_i)}}{E(N_i)} = \frac{1}{\sqrt{E(N_i)}} = E(N_i)^{-0.5}$$

Taking the logarithm on both sides gives:

$$\log CV(N_i) = -0.5 * \log E(N_i)$$

Therefore, the relationship between  $\log E(N_i)$  and  $\log CV(N_i)$  is linear with a slope of -0.5. This is indicated by the gray lines in Figure 1a-f.

The probability of observing a count of zero for  $N_i$  is given by the Poisson PMF:

$$f(x) = \frac{\lambda_i^x e^{-\lambda_i}}{x!}$$

Therefore,  $P(N_i = 0) = e^{-\lambda_i}$  values are shown as the orange lines in Figure 1g-i.

If a computational pipeline used to determine UMI counts reports systematically inflated values, then the median-normalized UMI counts for the  $i$ 'th gene can be approximately represented by a scaled Poisson variable  $N_i^{\text{inf}} = cN'_i$ , where  $c$  is the inflation factor.  $N_i^{\text{inf}}$  then has mean  $c\lambda'_i$  and variance  $c^2\lambda'_i$ , so for  $CV(N_i^{\text{inf}})$ , we have:

$$CV(N_i^{\text{inf}}) = \frac{\sqrt{\text{var}(N_i^{\text{inf}})}}{E(N_i^{\text{inf}})} = \frac{\sqrt{cE(N_i^{\text{inf}})}}{E(N_i^{\text{inf}})} = \sqrt{c} \frac{1}{\sqrt{E(N_i^{\text{inf}})}} = \sqrt{c} E(N_i^{\text{inf}})^{-0.5}$$

Taking the log on both sides gives:

$$\log CV(N_i^{\text{inf}}) = -0.5 \log E(N_i^{\text{inf}}) + 0.5 \log c$$

Therefore, the relationship between  $\log E(N_i^{\text{inf}})$  and  $\log CV(N_i^{\text{inf}})$  will still be linear, but with an y-axis intercept of  $0.5 \log c$  instead of 0, which is consistent with Figure 3b,e.

### 604 Prediction of the effect of aggregating scRNA-Seq expression profiles from technical replicates

605 We again assume that for droplets containing identical pools of pure mRNA, the median-normalized UMI counts  $N'_{i1}, \dots, N'_{in} \stackrel{i.i.d.}{\sim} \text{Poisson}(\lambda_i)$ . Let  $S'_i = \sum_j N'_{ij}$ , and  $N_i \sim \text{Poisson}(\lambda'_i)$ . It is clear that  $CV(S'_i) = CV(N'_i)/\sqrt{n}$ :

$$CV(S'_i) = \frac{\sqrt{\text{var}(S'_i)}}{E(S'_i)} = \frac{\sqrt{n * \text{var}(N_i)}}{nE(N_i)} = \frac{1}{\sqrt{n}} CV(N_i)$$

Similarly, for averaged UMI counts  $A'_i = \sum_j N_{ij}/n$ :

$$CV(A'_i) = \frac{\sqrt{\text{var}(A'_i)}}{E(A'_i)} = \frac{\sqrt{(1/n^2) * \text{var}(N_i)}}{E(N_i)} = \frac{1}{\sqrt{n}} CV(N_i)$$

606 This effect is demonstrated in Figure 2.

## 607 Smoothing of scRNA-Seq expression profiles from biological samples based on Poisson 608 statistics

609 In real data, genes can exhibit differential expression across cells. Therefore, we define  $\lambda_{ij} = m_{ij}e_j$ ,  
610 where  $m_{ij}$  is the number of mRNA molecules present for the  $i$ 'th gene in the  $j$ 'th cell, and  $e_j$  is the capture  
611 efficiency of the scRNA-Seq protocol for the  $j$ 'th cell. Let  $U_{ij}$  be a random variable representing the UMI  
612 count for the  $i$ 'th gene in the  $j$ 'th cell. We again assume that  $U_{ij}$  is Poisson-distributed with mean  $\lambda_{ij}$ , and  
613 that  $U_{i1}, \dots, U_{in}$  are independent, for all  $i$ . Let  $\mathcal{Z}_j = \{z_{j1}, \dots, z_{jk}\}$  be the set of  $k$  nearest neighbors of the  
614  $j$ 'th cell, as determined in Algorithm 1. Let  $\lambda_{ij}^{\text{smooth}} = \lambda_{ij} + \sum_{z \in \mathcal{Z}_j} \lambda_{iz}$ . We then define the aggregated  
615 expression level  $A_{ij} = U_{ij} + \sum_{z \in \mathcal{Z}_j} U_{iz}$ , and note that  $A_{ij} \sim \text{Poisson}(\lambda_{ij}^{\text{smooth}})$ . From the aforementioned  
616 discussion, it follows that if the  $k$  neighbors have transcriptomes that are sufficiently similar to that of  
617 the  $j$ 'th cell, and if the efficiency noise is not too strong, then  $CV(A_{ij}) \approx CV(U_{ij})/\sqrt{k+1}$ . Similarly,  
618 we can calculate the averaged expression level  $S_{ij} = A_{ij}/(k+1)$ . Then  $S_{ij}$  is a Poisson variable with  
619 mean  $\lambda_{ij}^{\text{smooth}}$ , scaled by a factor of  $1/(k+1)$ , and therefore has the same CV as  $A_{ij}$ . The point here is  
620 that even if the  $U_{ij}$  are not identically distributed (due to expression differences and/or efficiency noise),  
621 simple aggregation or averaging will always result in Poisson-distributed smoothed values. The same is  
622 not true for weighted sums or averages. Let  $\{w_{j0}, w_{j1}, \dots, w_{jk}\}$  represent weights (all positive), and let  
623  $W_{ij} = w_{j0}U_{ij} + \sum_{z \in \mathcal{Z}_j} w_{jz}U_{iz}$ . Then the weighted sum  $W_{ij}$  is neither a Poisson nor a scaled Poisson  
624 variable, unless all weights are identical.

## 625 Download and processing of inDrop pancreatic islet data

626 Raw sequencing data were downloaded from SRA (experiment accession SRX1935938). In this  
627 experiment by Baron et al. (2016), inDrop was applied to pancreatic islet tissue from a human donor. Data  
628 was processed using the same pipeline used for the inDrop pure RNA data, and only profiles with a total  
629 UMI count of at least 1,000, resulting in a dataset containing UMI counts for 19,865 protein-coding genes  
630 across 2,109 cells. We refer to this dataset as the PANCREAS dataset.

## 631 Download and processing of 10x Genomics Chromium (v2) peripheral blood mononu- 632 clear cell (PBMC) data

633 We downloaded the UMI-filtered expression matrix of the dataset titled “4k PBMCs from a Healthy  
634 Donor” from the 10x Genomics website ([www.10xgenomics.com](http://www.10xgenomics.com)). The data was processed by 10x  
635 Genomics using the “Cell Ranger” software, version 2.1.0. A QC report of the dataset is available on  
636 the 10x Genomics website. The downloaded expression matrix contained 33,694 genes and 4,340 cells.  
637 We removed 13,921 genes that had no expression in the entire dataset, and then another 8 genes with  
638 duplicate gene names (keeping only the first instance of each gene). The final dataset contained 19,765  
639 genes. We refer to this dataset as the PMBC dataset.

## 640 Download and processing of mouse myeloid progenitor data

641 UMI counts were downloaded from GEO, accession number GSE72857. The 19 clusters for cells are  
642 available at MAGIC's (Dijk et al. 2017) code repository: <https://github.com/pkathail/magic/issues/34>.  
643 27,297 cells with cluster labels were used for performing k-nearest neighbor smoothing (see Algorithm 1),  
644 and smoothed values were normalized to TPM (UMI-filtered transcripts per million). For visualization  
645 as a heatmap in Figure S6a-b, the z-score of every gene across cells was calculated. For scatter plots in  
646 Figure S6c-e, the expression of each gene was  $\log_2(\text{TPM} + 1)$ .

## 647 Analysis of scRNA-Seq data using principal component analysis (PCA) and hierarchical 648 clustering

649 Both PCA and hierarchical clustering were performed on median-normalized and Freeman-Tukey trans-  
650 formed (FT-transformed) data. The procedure that we refer to as “median-normalization” is equivalent  
651 to “Model I” in Grün, Kester, and Oudenaarden (2014). It involves first calculating the median total  
652 UMI count across all cells in the dataset, and then scaling the expression profile of each cell so that  
653 its total UMI count equals this median value. More formally, for a dataset containing  $p$  genes and  
654  $n$  cells, let  $\mathbf{u}_j = (u_{1j}, \dots, u_{pj})^T$  represent the expression profile (gene UMI counts) of the  $j$ 'th cell  
655 (either unsmoothed, or after kNN-smoothing without dividing by  $k+1$ ). Let  $t_j = \sum_i u_{ij}$  represent the  
656 total UMI count of the  $j$ 'th cell. Then let  $t^{\text{med}} = \text{median}\{t_1, \dots, t_n\}$  be the median total UMI count.  
657 Median-normalization then consists of calculating scaled expression profiles  $\mathbf{u}_j^{\text{norm}} = (t^{\text{med}}/t_j) * \mathbf{u}_j$ .

658 The Freeman-Tukey transform is a variance-stabilization transformation for Poisson-distributed  
659 data proposed by [Freeman and Tukey \(1950\)](#). It is defined as  $f(x) = \sqrt{x} + \sqrt{x+1}$ . We apply this  
660 transformation to the normalized UMI counts to ensure that independently of gene expression level, the  
661 absolute level of technical noise is comparable between genes. Specifically, we calculate the transformed  
662 UMI counts as  $u_{ij}^{\text{trans}} = \sqrt{u_{ij}^{\text{norm}}} + \sqrt{u_{ij}^{\text{norm}} + 1}$ .

663 PCA was performed on median-normalized and FT-transformed data, retaining all genes in the  
664 PANCREAS and PMBC datasets, respectively, using the `sklearn.decomposition.PCA` class  
665 from `scikit-learn` v0.19.1. Hierarchical clustering was also performed on median-normalized  
666 and FT-transformed data, but after filtering for the 1,000 most variable genes, using the  
667 `scipy.cluster.hierarchy.linkage` function from `scipy` v1.0.0. More specifically, we  
668 calculated the variance for each gene in median-normalized and FT-transformed data, and retained the  
669 1,000 genes with the largest variance. For clustering cells, we used Euclidean distance, and for clustering  
670 cells, we used correlation distance. In both cases, we used average linkage. for clustering genes and  
671 Euclidean distance for clustering cells, both with average linkage. To visualize the clustered data as a  
672 heatmap, we re-ordered the genes and cells according to the results of the hierarchical clustering, and  
673 standardized the expression values of each gene by subtracting the mean and dividing by its sample  
674 standard deviation.

### 675 Selection of cell type-specific marker genes

676 For cell types in the PANCREAS dataset, we selected the same genes used by [Baron et al. \(2016\)](#). For the  
677 PMBC dataset, we manually selected genes based on well-known markers, a previously published analysis  
678 of scRNA-Seq PBMC data ([Zheng et al. 2017](#)), and literature searches. In particular, for monocytes, we  
679 followed known protein surface markers and selected *CD33*, a myeloid lineage marker, *CD14*, specifically  
680 expressed in monocytes, and *CD16*, expressed on a subset of monocytes, as well as certain NK cells and  
681 T cells ([Naeim et al. 2013](#)). To mark dendritic cells, we selected *FCER1A* and *CLEC9A*, both previously  
682 shown to be specifically expressed in those cells ([Villani et al. 2017](#)). For T cells, we used *CD3D* and  
683 *CD3E*, the protein products of which form a dimer of the T cell receptor complex, and are pan T cell  
684 markers ([Naeim et al. 2013](#)). We also included *CD8A* and *CD8B*, encoding two isoforms of the CD8 T cell  
685 co-receptor present on cytotoxic T cells. For NK cells, we included *NCAM1* (CD56), *NCR1* (CD335), and  
686 *KLRD1*(CD94), all of which are expressed on NK cells at the protein level ([Naeim et al. 2013](#)). Finally,  
687 for B cells we included *CD19*, *MS4A1* (CD20), and *CD79A*, all well-known B cell markers ([Naeim et al.](#)  
688 [2013](#)).

### 689 Simulation of scRNA-Seq data

690 The SIM-PANCREAS dataset was simulated based on the PANCREAS dataset using the following  
691 approach: First, we used smoothing and hierarchical clustering to group the cells in the PANCREAS  
692 dataset into ten clusters. To do so, we applied kNN-smoothing with  $k = 31$ . Then, the smoothed  
693 dataset was median-normalized, and the normalized values were Freeman-Tukey transformed. Then, the  
694 dataset was filtered for the top 2,000 most variable genes, and hierarchical (agglomerative) clustering  
695 was performed on the cells, using average linkage and the Euclidean distance metric. The resulting tree  
696 was cut at the appropriate height to produce ten clusters. We chose hierarchical clustering over other  
697 clustering methods because it simplifies the visualization of clustering results, and because it can ensure  
698 a certain degree of consistency between simulated datasets that only differ in terms of the number of  
699 clusters simulated.

700 After assigning all cells to one of ten clusters, we calculated the cluster expression profiles by averaging  
701 the expression profiles of all cells assigned to that cluster, using the original (unsmoothed) UMI counts.  
702 For each cell in PANCREAS, we then simulated a corresponding expression profile for inclusion in the  
703 SIM-PANCREAS dataset, by looking up the cluster it was assigned to, scaling the cluster expression  
704 profile to match the observed number of transcripts for that cell, and then drawing the expression value  
705 for each gene from a Poisson distribution with the corresponding  $\lambda$  parameter.

706 To formalize this procedure, let  $p$  be the number of genes in the PANCREAS dataset, and let  $u_j =$   
707  $(u_{1j}, \dots, u_{pj})^T$  represent the expression profile (gene UMI counts) of the  $j$ 'th cell (before smoothing). Let  
708  $z_j \in \{1, \dots, 10\}$  represent the cluster assignment of the  $j$ 'th cell (obtained using hierarchical clustering,  
709 as described above). For the simulation, we then define a corresponding set of 10 clusters. Let  $e_c =$   
710  $(e_{1c}, \dots, e_{pc})^T$  represent the true expression profile of the  $j$ 'th cluster, which we define using  $e_{ic} =$   
711  $\sum_{j \in \mathcal{Z}_c} u_{ij} / |\mathcal{Z}_c|$ . Let  $t_j = \sum_i u_{ij}$  represent the total UMI count of the  $j$ 'th cell. Let  $a_c = \sum_{j \in \mathcal{Z}_c} t_j / |\mathcal{Z}_c|$

712 represent the average total UMI count for cells in the  $c$ 'th cluster. We use this information to simulate a  
713 dataset with  $n$  cells. Let  $\mathbf{u}'_j = (u'_{1j}, \dots, u'_{pj})^T$  represent the expression profile (gene UMI counts) of the  
714  $j$ 'th cell in the simulated dataset. We obtain each  $u'_{ij}$  by sampling from a Poisson distribution with mean  
715 parameter  $\lambda_{ij}$ , where  $\lambda_{ij} = (t_j/a_{z_j}) * e_{iz_j}$ .

716 The SIM-PBMC dataset was simulated based on the PMBC dataset using a completely analogous  
717 procedure.

## 718 Comparison of the accuracies of kNN-smoothing, MAGIC, and scImpute on simulated 719 data

720 We downloaded **MAGIC** (commit 4d5efb4) from GitHub, and installed the Python package included.  
721 We also installed the **scImpute** R package (v0.0.4; commit dda0441) from GitHub, using the command  
722 `install_github("Vivianstats/scImpute")`. We then applied both methods, as well as kNN-  
723 smoothing, to the SIM-PANCREAS dataset (testing different parameter choices; see below). For each  
724 cell in the dataset, we looked up the identity of the cluster that was used as the basis for the simulation  
725 of that cell's expression profile. The expression profile of that cluster represented the ground truth that  
726 the smoothed expression profile should ideally be identical to. To quantify the similarity between the  
727 smoothed and the ground truth expression profile, we first applied a  $\log_2$ -transformation to both profiles,  
728 adding a pseudocount of 1:  $f(x) = \log_2(x + 1)$ . We then calculated the Pearson correlation coefficient  
729 (PCC) between the smoothed and ground truth expression profiles, as well as the root mean squared  
730 distance (RMSE) between those profiles. We visualized the results using boxplots in which each value  
731 represents the PCC or RMSE of a single profile (cell) after smoothing. We also calculated PCC and RMSE  
732 for values transformed using a square root transformation instead of a log-transformation:  $f(x) = \sqrt{x}$ ,  
733 and visualized the results as a boxplot. Finally, we repeated the entire procedure for the SIM-PBMC  
734 dataset.

735 For MAGIC, we varied the  $t$  parameter between 1 and 9, while setting the other parameters to the  
736 values recommended in the **tutorial** provided by the authors of this method: `n_pca_components=20`,  
737 `k=30`, `ka=10`. We reasoned that of all parameters,  $t$  has by far the strongest effect on the smoothing  
738 results, as it is the power to which the Markov affinity matrix is raised.  $t$  can also be interpreted as the  
739 length of a random walk, and larger values of  $t$  therefore lead to much stronger smoothing (Dijk et al.  
740 2017). For scImpute, we decided to vary both  $t$  and  $K$ . In this paper, we refer to  $t$  as  $d$ , in order to avoid  
741 confusion with MAGIC's  $t$  parameter.  $d$  is the dropout probability threshold that determines the set of  
742 genes which will have their expression values imputed.  $K$  is the number of clusters that determines the  
743 sets of candidate neighbors, used to build statistical models to estimate dropout probabilities for each  
744 gene (W. V. Li and J. J. Li 2017).

745 We applied MAGIC using its Python interface (function `SCData.run_magic`), in accordance with  
746 the tutorial. We noticed that MAGIC dropped all genes that had no expression in any cell in the simulated  
747 datasets, and therefore took care to add these genes back (with zero values) to the smoothed matrix, in  
748 order to ensure an unbiased comparison with the other methods (additional or missing zero values change  
749 the value of the PCC). We applied scImpute using its R interface (function `scimpute`). It is noteworthy  
750 that while the runtime of MAGIC was comparable to kNN-smoothing (usually finishing within seconds or  
751 minutes), scImpute routinely took several hours to finish, even when using 4 CPU cores (`ncores=4`).

## 752 Measuring the runtime of the kNN-smoothing Python implementation

753 To measure the runtime of our kNN-smoothing Python implementation, we downloaded the **UMI-filtered**  
754 **gene expression matrix** of the dataset titled "8k PBMCs from a Healthy Donor" from the 10x Genomics  
755 website. After filtering for genes with expression and removing duplicated (analogous to our processing  
756 of the PMBC dataset), we obtained a dataset containing 21,425 genes and 8,381 cells. To test the runtime  
757 of kNN-smoothing we randomly sampled  $n=2,000$ ,  $n=4,000$  and  $n=8,000$  cells (without replacement)  
758 and measured the runtime (wall time) of the algorithm for different settings of  $k$ . For each combination  
759 of  $n$  and  $k$ , we repeated this procedure three times. All tests were performed using Python v3.5.4 on  
760 Ubuntu® 17.10.

## 761 ACKNOWLEDGMENTS

762 We would like to thank Bo Xia, Maayan Baron, Dr. Gustavo França for helpful discussions.



## 763 REFERENCES

- 764 Baron, Maayan et al. (2016). “A Single-Cell Transcriptomic Map of the Human and Mouse Pancreas  
765 Reveals Inter- and Intra-cell Population Structure”. In: *Cell Systems* 3.4, 346–360.e4. DOI: [10.1016/  
766 j.cels.2016.08.011](https://doi.org/10.1016/j.cels.2016.08.011).
- 767 Cao, Junyue et al. (2017). “Comprehensive single-cell transcriptional profiling of a multicellular organism”.  
768 In: *Science (New York, N.Y.)* 357.6352, pp. 661–667. DOI: [10.1126/science.aam8940](https://doi.org/10.1126/science.aam8940).
- 769 Dijk, David van et al. (2017). “MAGIC: A diffusion-based imputation method reveals gene-gene interac-  
770 tions in single-cell RNA-sequencing data”. In: *bioRxiv*. DOI: [10.1101/111591](https://doi.org/10.1101/111591).
- 771 Eden, Eran et al. (2009). “GORilla: a tool for discovery and visualization of enriched GO terms in ranked  
772 gene lists”. In: *BMC Bioinformatics* 10, p. 48. DOI: [10.1186/1471-2105-10-48](https://doi.org/10.1186/1471-2105-10-48).
- 773 Eisen, M. B. et al. (1998). “Cluster analysis and display of genome-wide expression patterns”. In:  
774 *Proceedings of the National Academy of Sciences of the United States of America* 95.25, pp. 14863–  
775 14868.
- 776 Fan, Jean et al. (2016). “Characterizing transcriptional heterogeneity through pathway and gene set  
777 overdispersion analysis”. In: *Nature Methods*. DOI: [10.1038/nmeth.3734](https://doi.org/10.1038/nmeth.3734).
- 778 Freeman, Murray F. and John W. Tukey (1950). “Transformations Related to the Angular and the Square  
779 Root”. In: *The Annals of Mathematical Statistics* 21.4, pp. 607–611. DOI: [10.1214 / aoms /  
780 1177729756](https://doi.org/10.1214/aoms/1177729756).
- 781 Gierahn, Todd M. et al. (2017). “Seq-Well: portable, low-cost RNA sequencing of single cells at high  
782 throughput”. In: *Nature Methods* 14.4, pp. 395–398. DOI: [10.1038/nmeth.4179](https://doi.org/10.1038/nmeth.4179).
- 783 Grün, Dominic, Lennart Kester, and Alexander van Oudenaarden (2014). “Validation of noise models for  
784 single-cell transcriptomics”. In: *Nature Methods* 11.6, pp. 637–640. DOI: [10.1038/nmeth.2930](https://doi.org/10.1038/nmeth.2930).
- 785 Hashimshony, Tamar, Naftalie Senderovich, et al. (2016). “CEL-Seq2: sensitive highly-multiplexed  
786 single-cell RNA-Seq”. In: *Genome Biology* 17, p. 77. DOI: [10.1186/s13059-016-0938-8](https://doi.org/10.1186/s13059-016-0938-8).
- 787 Hashimshony, Tamar, Florian Wagner, et al. (2012). “CEL-Seq: single-cell RNA-Seq by multiplexed linear  
788 amplification”. In: *Cell Reports* 2.3, pp. 666–673. DOI: [10.1016/j.celrep.2012.08.003](https://doi.org/10.1016/j.celrep.2012.08.003).
- 789 Islam, Saiful, Una Kjällquist, et al. (2011). “Characterization of the single-cell transcriptional landscape  
790 by highly multiplex RNA-seq”. In: *Genome Research* 21.7, pp. 1160–1167. DOI: [10.1101/gr.  
791 110882.110](https://doi.org/10.1101/gr.110882.110).
- 792 Islam, Saiful, Amit Zeisel, et al. (2014). “Quantitative single-cell RNA-seq with unique molecular  
793 identifiers”. In: *Nature Methods* 11.2, pp. 163–166. DOI: [10.1038/nmeth.2772](https://doi.org/10.1038/nmeth.2772).
- 794 Kharchenko, Peter V., Lev Silberstein, and David T. Scadden (2014). “Bayesian approach to single-cell  
795 differential expression analysis”. In: *Nature Methods* 11.7, pp. 740–742. DOI: [10.1038/nmeth.  
796 2967](https://doi.org/10.1038/nmeth.2967).
- 797 Klein, Allon M. et al. (2015). “Droplet barcoding for single-cell transcriptomics applied to embryonic  
798 stem cells”. In: *Cell* 161.5, pp. 1187–1201. DOI: [10.1016/j.cell.2015.04.044](https://doi.org/10.1016/j.cell.2015.04.044).
- 799 Kleiveland, Charlotte R. (2015). “Peripheral Blood Mononuclear Cells”. In: *The Impact of Food Bioactives  
800 on Health*. DOI: 10.1007/978-3-319-16104-4\_15. Springer, Cham, pp. 161–167.
- 801 La Manno, Gioele et al. (2017). “RNA velocity in single cells”. In: *bioRxiv*. DOI: [10.1101/206052](https://doi.org/10.1101/206052).
- 802 Li, Wei Vivian and Jingyi Jessica Li (2017). “scImpute: Accurate And Robust Imputation For Single Cell  
803 RNA-Seq Data”. In: *bioRxiv*, p. 141598. DOI: [10.1101/141598](https://doi.org/10.1101/141598).
- 804 Love, Michael I., Wolfgang Huber, and Simon Anders (2014). “Moderated estimation of fold change and  
805 dispersion for RNA-seq data with DESeq2”. In: *Genome Biology* 15.12, p. 550. DOI: [10.1186/  
806 s13059-014-0550-8](https://doi.org/10.1186/s13059-014-0550-8).
- 807 Lun, Aaron T. L., Karsten Bach, and John C. Marioni (2016). “Pooling across cells to normalize single-  
808 cell RNA sequencing data with many zero counts”. In: *Genome Biology* 17, p. 75. DOI: [10.1186/  
809 s13059-016-0947-7](https://doi.org/10.1186/s13059-016-0947-7).
- 810 Macosko, Evan Z. et al. (2015). “Highly Parallel Genome-wide Expression Profiling of Individual Cells  
811 Using Nanoliter Droplets”. In: *Cell* 161.5, pp. 1202–1214. DOI: [10.1016/j.cell.2015.05.  
812 002](https://doi.org/10.1016/j.cell.2015.05.002).
- 813 Naeim, Faramarz et al. (2013). “Principles of Immunophenotyping”. In: *Atlas of Hematopathology*. DOI:  
814 [10.1016/B978-0-12-385183-3.00002-4](https://doi.org/10.1016/B978-0-12-385183-3.00002-4). Academic Press, pp. 25–46.
- 815 *National Cancer Institute* (2017). Division of Cancer Prevention. URL: [https://prevention.  
816 cancer.gov/news-and-events/news/pre-cancer-atlas-pca-and](https://prevention.cancer.gov/news-and-events/news/pre-cancer-atlas-pca-and) (visited on  
817 01/20/2018).

- 818 Paul, Franziska et al. (2015). “Transcriptional Heterogeneity and Lineage Commitment in Myeloid  
819 Progenitors”. In: *Cell* 163.7, pp. 1663–1677. DOI: [10.1016/j.cell.2015.11.013](https://doi.org/10.1016/j.cell.2015.11.013).
- 820 Pierson, Emma and Christopher Yau (2015). “ZIFA: Dimensionality reduction for zero-inflated single-cell  
821 gene expression analysis”. In: *Genome Biology* 16, p. 241. DOI: [10.1186/s13059-015-0805-](https://doi.org/10.1186/s13059-015-0805-z)  
822 [z](https://doi.org/10.1186/s13059-015-0805-z).
- 823 Regev, Aviv et al. (2017). “Science Forum: The Human Cell Atlas”. In: *eLife* 6, e27041. DOI: [10.7554/  
824 eLife.27041](https://doi.org/10.7554/eLife.27041).
- 825 Risso, Davide et al. (2017). “ZINB-WaVE: A general and flexible method for signal extraction from  
826 single-cell RNA-seq data”. In: *bioRxiv*. DOI: [10.1101/125112](https://doi.org/10.1101/125112).
- 827 Rosenberg, Alexander B et al. (2017). “Scaling single cell transcriptomics through split pool barcoding”.  
828 In: *bioRxiv*. DOI: [10.1101/105163](https://doi.org/10.1101/105163).
- 829 Sasagawa, Yohei et al. (2017). “Quartz-Seq2: a high-throughput single-cell RNA-sequencing method that  
830 effectively uses limited sequence reads”. In: *bioRxiv*. DOI: [10.1101/159384](https://doi.org/10.1101/159384).
- 831 Shekhar, Karthik et al. (2016). “Comprehensive Classification of Retinal Bipolar Neurons by Single-Cell  
832 Transcriptomics”. In: *Cell* 166.5, 1308–1323.e30. DOI: [10.1016/j.cell.2016.07.054](https://doi.org/10.1016/j.cell.2016.07.054).
- 833 Subramanian, Aravind et al. (2005). “Gene set enrichment analysis: a knowledge-based approach for  
834 interpreting genome-wide expression profiles”. In: *Proceedings of the National Academy of Sciences  
835 of the United States of America* 102.43, pp. 15545–15550. DOI: [10.1073/pnas.0506580102](https://doi.org/10.1073/pnas.0506580102).
- 836 Tang, Fuchou et al. (2009). “mRNA-Seq whole-transcriptome analysis of a single cell”. In: *Nature  
837 Methods* 6.5, pp. 377–382. DOI: [10.1038/nmeth.1315](https://doi.org/10.1038/nmeth.1315).
- 838 *The Chan Zuckerberg Initiative* (2018). Human Cell Atlas. URL: [https://chanzuckerberg.com/  
839 human-cell-atlas](https://chanzuckerberg.com/human-cell-atlas) (visited on 01/21/2018).
- 840 Villani, Alexandra-Chloé et al. (2017). “Single-cell RNA-seq reveals new types of human blood den-  
841 dritic cells, monocytes, and progenitors”. In: *Science (New York, N.Y.)* 356.6335. DOI: [10.1126/  
842 science.aah4573](https://doi.org/10.1126/science.aah4573).
- 843 Wagner, Florian (2015). “GO-PCA: An Unsupervised Method to Explore Gene Expression Data Using  
844 Prior Knowledge”. In: *PloS One* 10.11, e0143196. DOI: [10.1371/journal.pone.0143196](https://doi.org/10.1371/journal.pone.0143196).
- 845 Zheng, Grace X. Y. et al. (2017). “Massively parallel digital transcriptional profiling of single cells”. In:  
846 *Nature Communications* 8, p. 14049. DOI: [10.1038/ncomms14049](https://doi.org/10.1038/ncomms14049).
- 847 Ziegenhain, Christoph et al. (2017). “Comparative Analysis of Single-Cell RNA Sequencing Methods”.  
848 In: *Molecular Cell* 65.4, 631–643.e4. DOI: [10.1016/j.molcel.2017.01.023](https://doi.org/10.1016/j.molcel.2017.01.023).

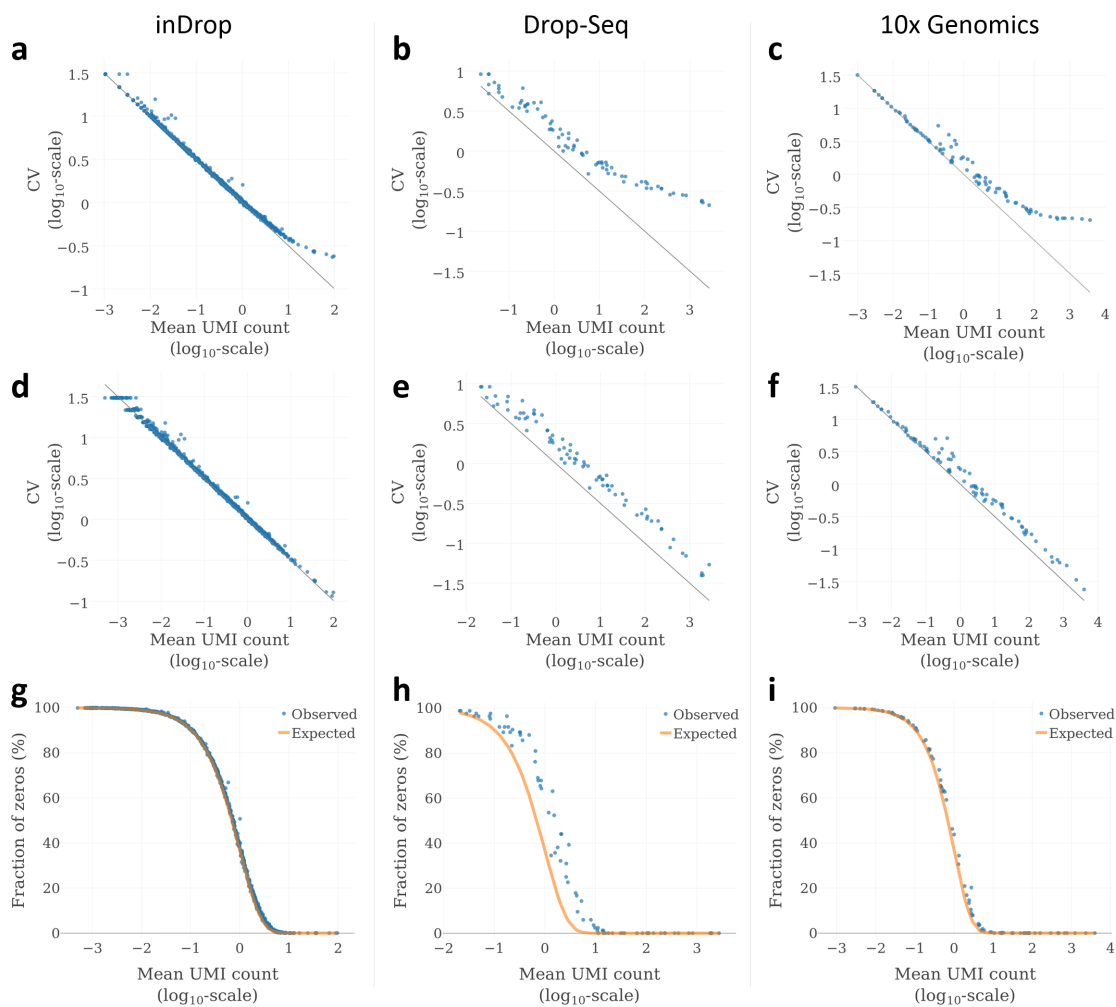

**Figure 1. Noise profiles of three high-throughput single-cell RNA-Seq platforms.** (a-c) Relationship between mean UMI count and coefficient of variation (CV) in pure RNA replicates, analyzed using inDrop (a) Drop-seq (b), and 10x Genomics (c). For inDrop, RNA was extracted from cultered cells (Klein et al. 2015). For Drop-Seq and 10x Genomics, ERCC spike-in RNA was analyzed (see Macosko et al. (2015) and Zheng et al. (2017)). (d-f) The same relationship after normalizing each profile to the median total UMI count (see Methods). (g-i) Expected vs. observed fraction of zeros, as a function of mean expression (after median-normalization). For inDrop data (a, d and g), a randomly sampled subset of 1,000 genes is shown for better readability.

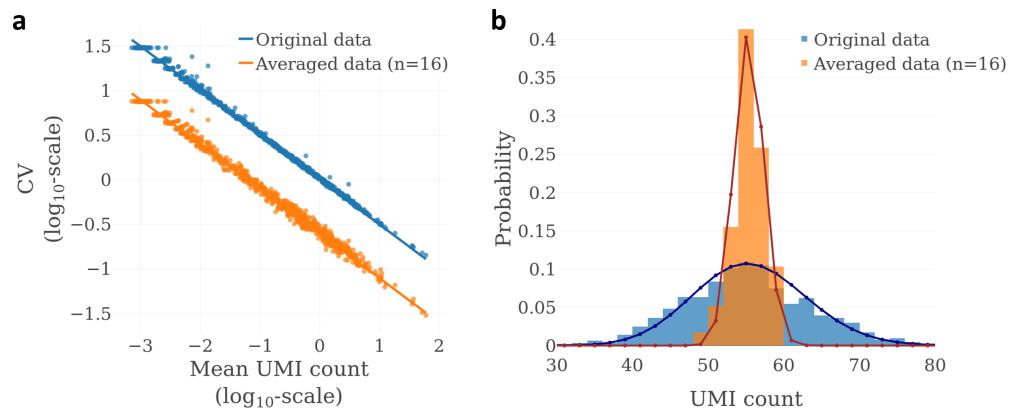

**Figure 2. Simple averaging of scRNA-Seq expression profile replicates reduces the coefficient of variation in a manner predicted by Poisson statistics.** (a) Effect of averaging on the coefficient of variation, for 1,000 randomly selected genes in the inDrop pure RNA dataset (Klein et al., 2015). Solid lines represent the theoretical relationship based on the Poisson distribution. After averaging of 16 profiles at a time, the CV can be seen shifted downwards by about 0.6 units, which corresponds to a factor of 4 on the log<sub>10</sub>-scale used. (b) Distribution of UMI counts for the *GAPDH* gene, before and after averaging. Bars show the observed UMI distributions. The solid lines show the theoretical distributions for a Poisson-distributed variable representing the original values (blue), and a scaled Poisson-distributed variable representing the averaged values (orange). To eliminate efficiency noise, both original and averaged profiles were normalized to the median total UMI count (Grün et al., 2014).

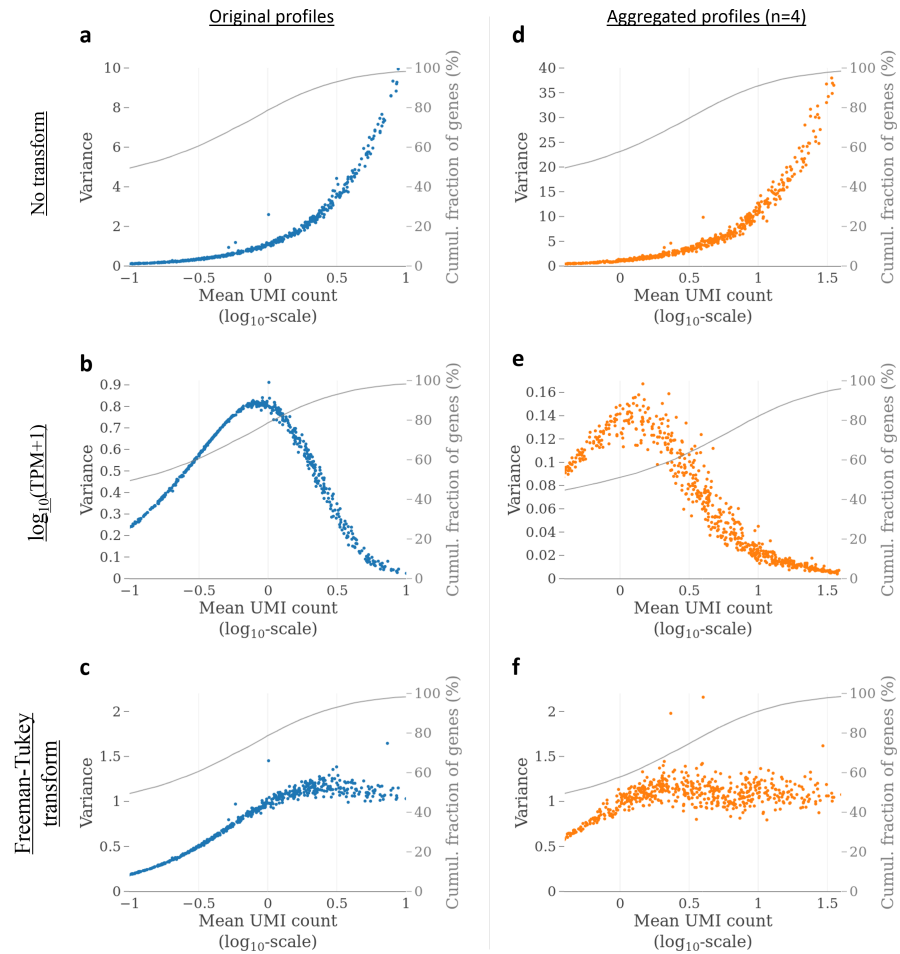

**Figure 3. Effect of scRNA-Seq data transformations on mean-variance relationships in technical replicates from the inDrop protocol. (a-c)** Gene mean-variance relationships in the pure RNA samples (Klein et al., 2015) without transformation, with  $\log_{10}(\text{TPM}+1)$  transform, and with Freeman-Tukey transform ( $y = \sqrt{x} + \sqrt{x+1}$ ), respectively. **(d-f)** Mean-variance relationships after aggregating the expression profiles of randomly selected, non-overlapping batches of 4 cells, for the same transformations. All plots show data for the same 1,000 randomly selected genes.

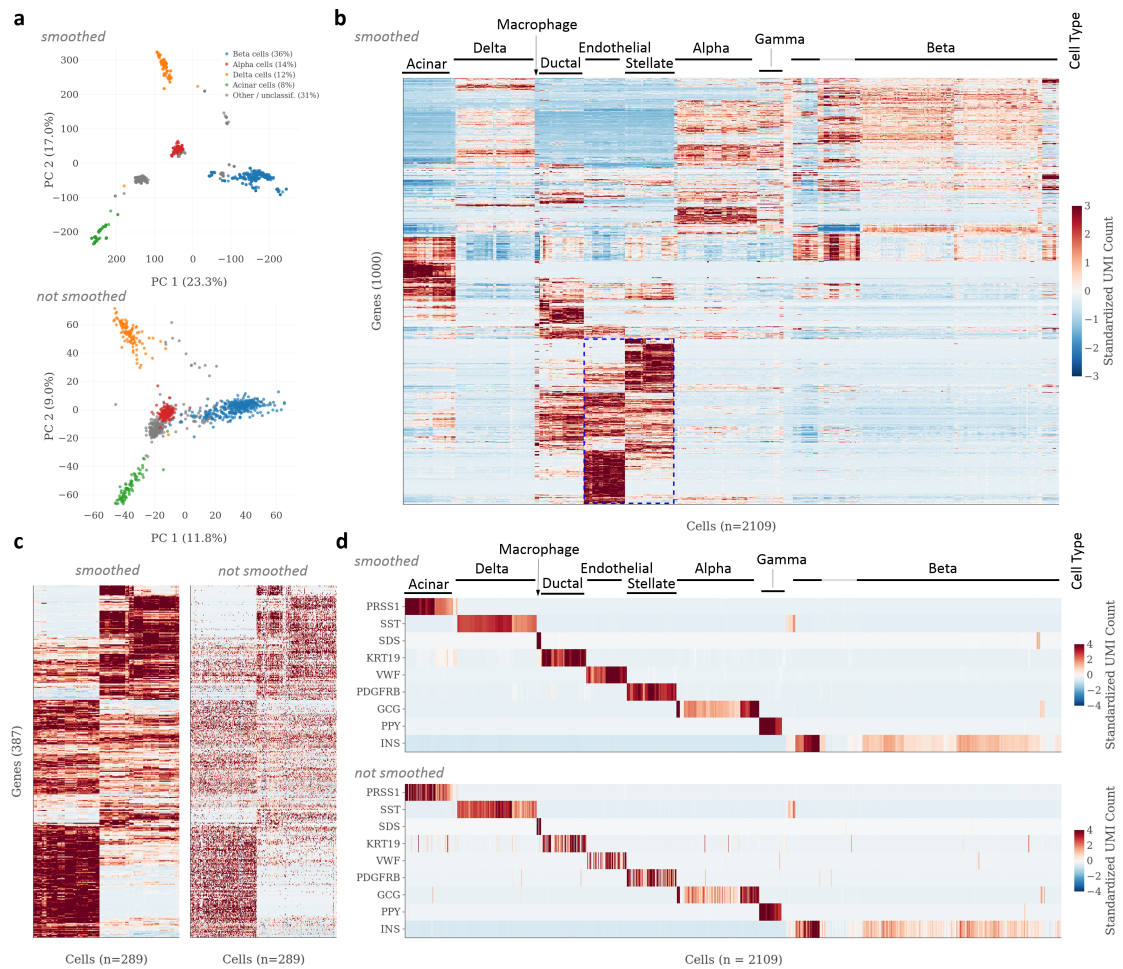

**Figure 4. Application of k-nearest neighbor smoothing to scRNA-Seq data from human pancreatic islet tissue.** All panels show data from the PANCREAS dataset, from a study by Baron et al. (2016). Smoothing was performed using  $k = 15$ . **a** Principal component analysis (PCA) with (top) and without (bottom) smoothing. Axis labels indicate the fraction of variance explained. Cell types were identified based on the smoothed data, using ad-hoc expression thresholds for the marker genes listed in Baron et al. (2016). Beta cells were defined as having expression of  $INS \geq 40,000$  TPM (UMI-filtered transcripts per million); alpha cells,  $GCG \geq 5,000$  TPM; delta cells,  $SST \geq 20,000$  TPM; acinar cells,  $CPAI \geq 1,000$  TPM. Cells that exceeded none of the thresholds, or more than one, were labeled as “other / unclassified”. **b** Heatmap showing clustered and standardized expression data for the 1,000 most variable genes, after smoothing. **c** Heatmap providing a zoomed-in view of the area marked in blue in (b), with (left) and without (right) smoothing. **d** Expression of cell type-specific marker genes (Baron et al. 2016) with (top) and without (bottom) smoothing. Cells are ordered as in (b). See Methods for details on how PCA and hierarchical clustering were performed.

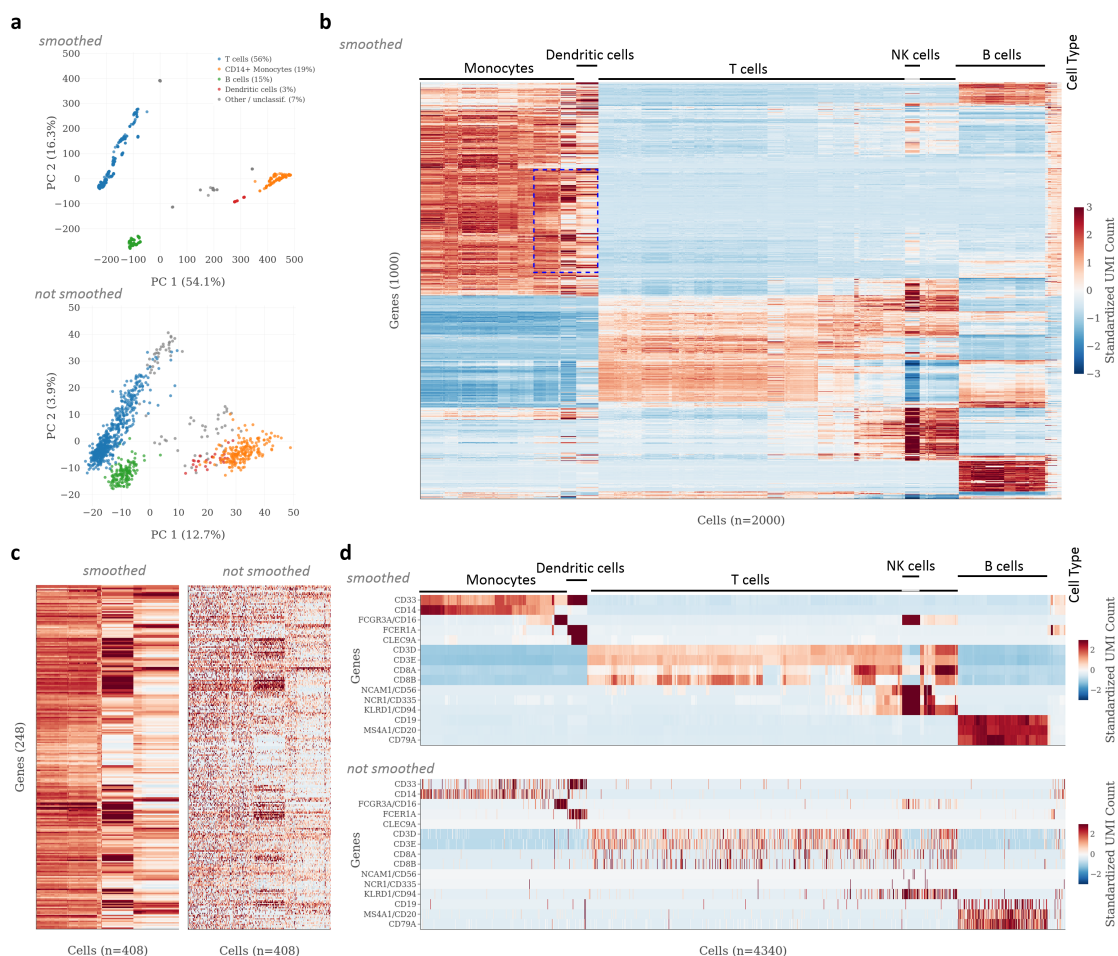

**Figure 5. Application of k-nearest neighbor smoothing to scRNA-Seq data from human peripheral blood mononuclear cells (PBMCs).** All panels show data from the PBMC dataset, published online by 10x Genomics. **a-c** Panels showing results of PCA and hierarchical clustering on smoothed and unsmoothed data, as in Figure 4. Cell types in (a) were identified based on the smoothed data, using ad-hoc expression thresholds for a list of marker genes compiled from the literature (see Methods). T cells were defined as having expression of  $CD83D \geq 500$  TPM (UMI-filtered transcripts per million); CD14+ monocytes,  $CD14 \geq 250$  TPM; B cells,  $CD79A \geq 1,000$  TPM; dendritic cells,  $FCERIA \geq 500$  TPM. Cells that exceeded none of the thresholds, or more than one, were labeled as “other / unclassified”. Due to technical limitations of the visualization library used, only a random subset of 2,000 cells (out of the 4,340 cells in the dataset) is shown in (b). **d** Expression of selected marker genes for the major cell types present in the data, with (top) and without (bottom) smoothing.

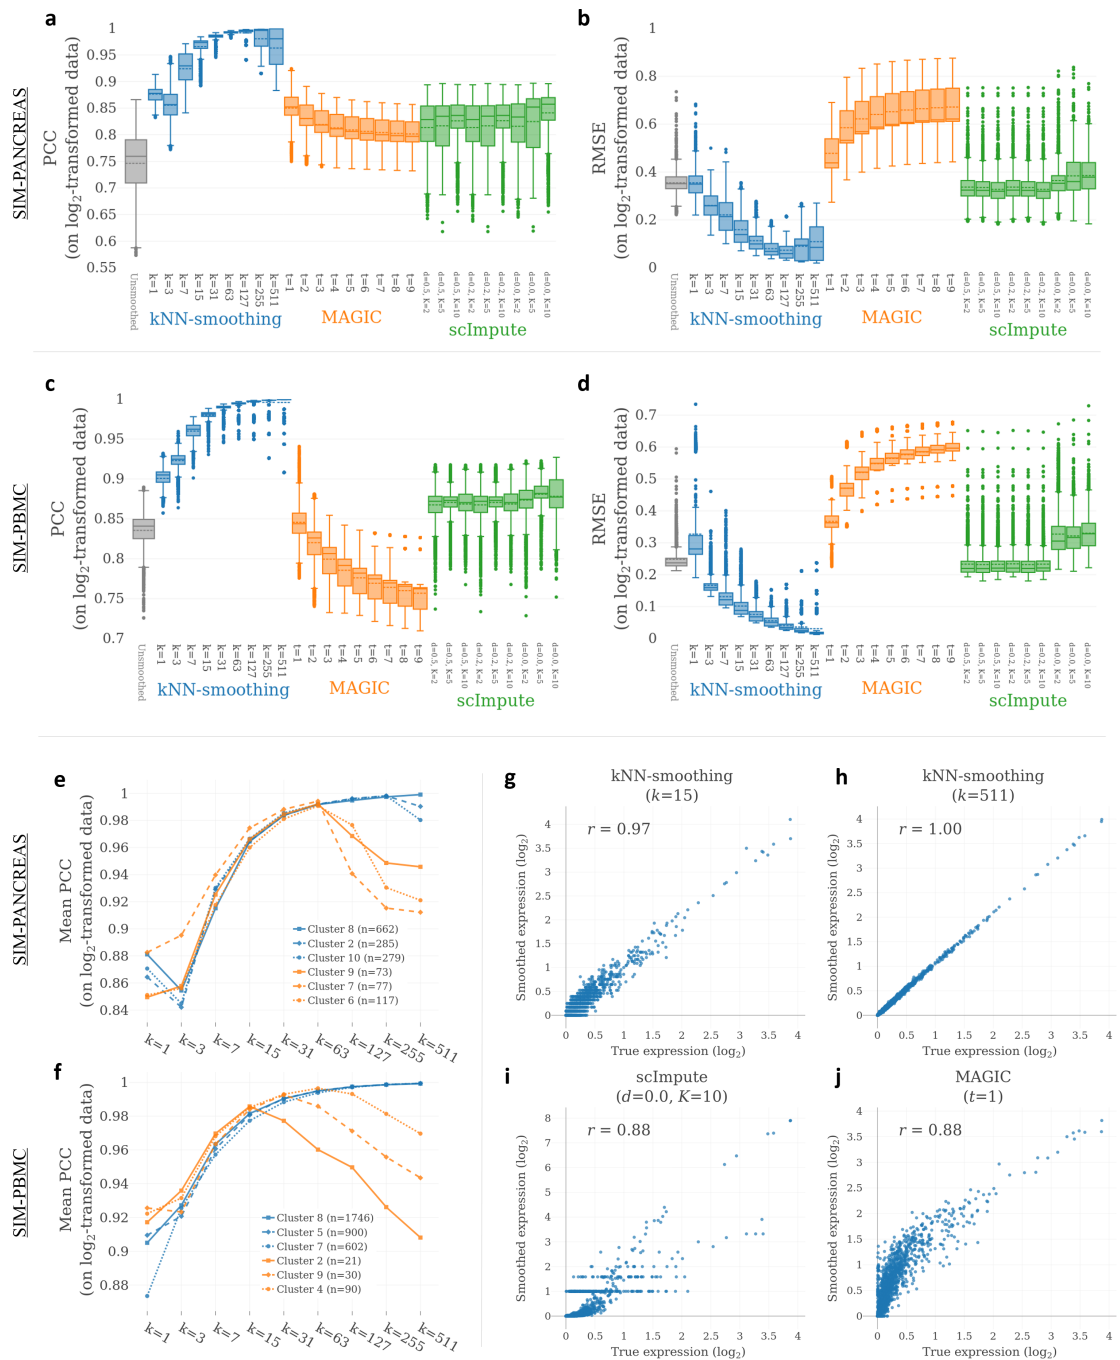

**Figure 6. Accuracy of kNN-smoothing in comparison to other smoothing methods for simulated scRNA-Seq data.** **a, b** Accuracy on SIM-PANCREAS dataset. **c, d.** Accuracy on SIM-PBMC dataset. **(a)** and **(c)** show relative accuracy of log<sub>2</sub>-transformed expression profiles, quantified using the Pearson correlation coefficient (PCC). **(b)** and **(d)** show absolute accuracy of log<sub>2</sub>-transformed expression profiles, quantified using root mean squared error (RMSE). Box plots summarize the distributions of values for all cells in the data. The three methods were each run with various different parameter settings, indicated on the x-axis (see [Methods](#) for details). **e, f** Average accuracy (PCC) of cells in the three largest and smallest clusters of the SIM-PANCREAS dataset (**e**) and SIM-PBMC (**f**) dataset, respectively, for different settings of  $k$  as indicated on the x-axis. **g-j** Correlation between true and smoothed expression profile for a representative cell from the largest cluster in the SIM-PANCREAS dataset, for kNN-smoothing, scImpute, and MAGIC, with parameter settings indicated above each panel.



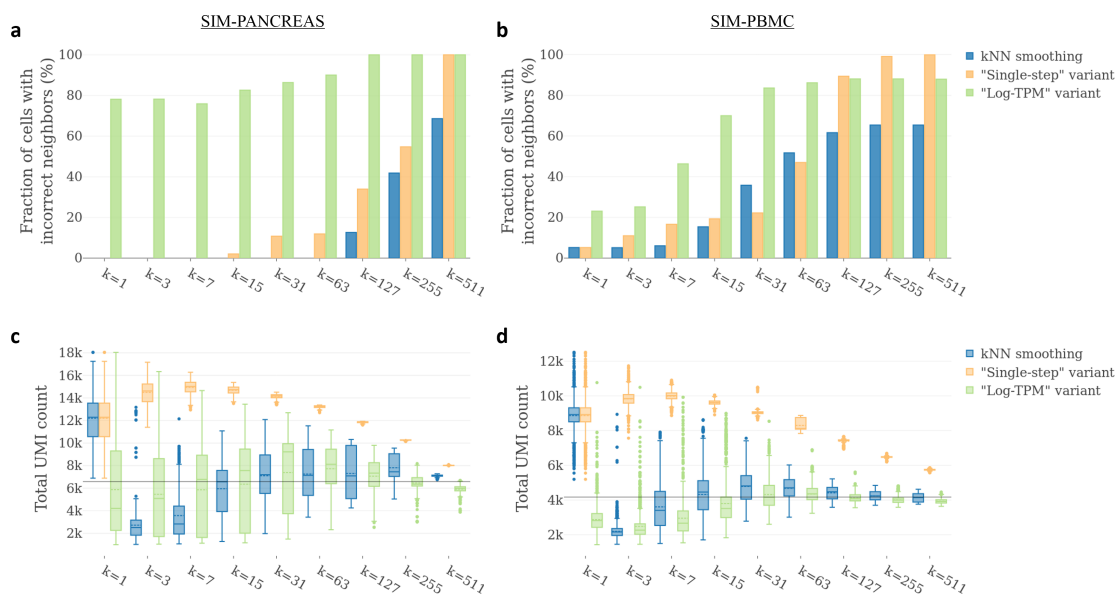

**Figure 7. Accuracy and size bias of kNN-smoothing in comparison to two variants of the algorithm, for simulated scRNA-Seq data.** **a, b** Accuracy quantified as the fraction of cells with “incorrect” neighbors selected by the smoothing algorithm when applied to the SIM-PANCREAS (**a**) and SIM-PBMC (**b**) datasets, respectively, with different settings of  $k$ , as indicated on the x-axis. A cell has an “incorrect neighbor” when at least one cell “neighbor” from a different cluster was included in the calculation of its smoothed expression profile. **c, d** Size bias measured by the total UMI count per cell in the SIM-PANCREAS (**c**) and SIM-PBMC (**d**) datasets, respectively, after smoothing with different settings of  $k$ , as indicated on the x-axis.

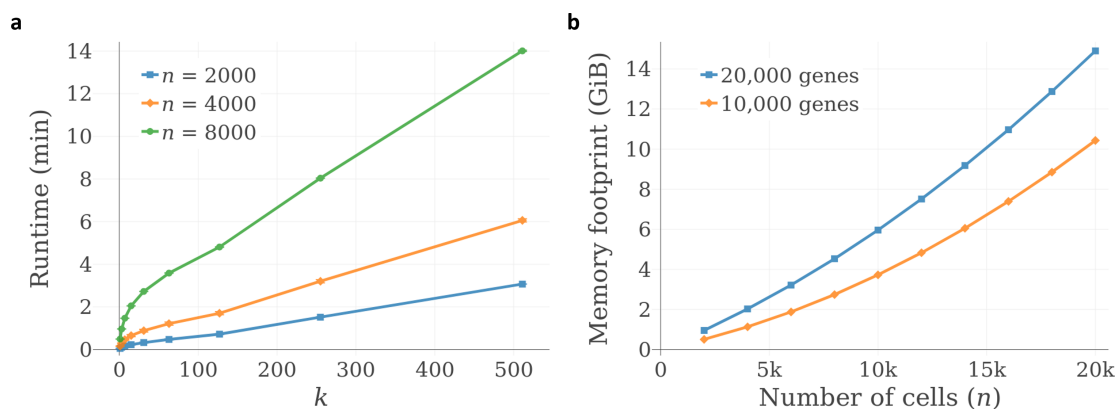

**Figure 8. Performance and memory footprint of kNN-smoothing for datasets of different sizes. a** Runtime of a Python implementation kNN-smoothing algorithm, applied to datasets obtained by subsampling different numbers of cells ( $n$ ) from a scRNA-Seq dataset of human peripheral blood mononuclear cells (PBMCs), published online by 10x Genomics. Smoothing was performed on 21,415 genes with expression. Settings of  $k$  are indicated on the x-axis. **b** Predicted memory footprint of the kNN-smoothing algorithm as a function of the number of cells in the dataset ( $n$ ). See [Methods](#) for details.
